# Supplementary material for: Deconvolution of monocyte responses in inflammatory bowel disease reveals an IL-1 cytokine network that regulates IL-23 in genetic and acquired IL-10 resistance
Source: PubMed Central journal article supplement (PMC8108288; doi:10.1136/gutjnl-2020-321731), 2020-10-09
Supplement: gutjnl-2020-321731supp003.pdf [file gutjnl-2020-321731supp003.pdf]

## Supplementary Table 1

| Number of patients (n)                       | Total |      |      |      | NA  | Crohn's disease |      |      |      | NA  | Ulcerative colitis |      |      |      | NA  | IBD unclassified |        |
|----------------------------------------------|-------|------|------|------|-----|-----------------|------|------|------|-----|--------------------|------|------|------|-----|------------------|--------|
|                                              | Mean  | SD   | Min  | Max  |     | Mean            | SD   | Min  | Max  |     | Mean               | SD   | Min  | Max  |     | IBDu 1           | IBDu 2 |
| Age (Years)                                  | 42.3  | 17.3 | 18.0 | 85.0 |     | 37.6            | 15.3 | 18.0 | 71.0 |     | 51.2               | 17.5 | 27.0 | 85.0 |     | 65.0             | 25.0   |
| Age at diagnosis (Years)                     | 26.0  | 14.9 | 9.0  | 78.0 |     | 19.4            | 8.2  | 9.0  | 38.0 |     | 37.3               | 15.4 | 19.0 | 78.0 |     | 61.0             | 11.0   |
| Gender (Female/Male) (%)                     | 51.2  | 48.8 |      |      |     | 46.2            | 53.8 |      |      |     | 61.5               | 38.5 |      |      |     | 50.0             | 50.0   |
| Montreal UC (E1/E2/E3) (%)                   |       |      |      |      |     |                 |      |      |      |     | 0                  | 31   | 69   |      |     | 0                | 100    |
| Montreal CD (A1/A2/A3) (%)                   |       |      |      |      |     | 46              | 54   | 0    |      |     |                    |      |      |      |     |                  | 0      |
| Montreal CD (L1/L2/L3/L4) (%)                |       |      |      |      |     | 8               | 27   | 65   | 19   |     |                    |      |      |      |     |                  |        |
| Montreal CD (B1/B2/B3/p) (%)                 |       |      |      |      |     | 38              | 38   | 27   | 42   |     |                    |      |      |      |     |                  |        |
| <b>Medication at time of study</b>           |       |      |      |      |     |                 |      |      |      |     |                    |      |      |      |     |                  |        |
| Adalimumab (%)                               | 17    |      |      |      |     | 19              |      |      |      |     | 8                  |      |      |      |     | 0                |        |
| Infliximab (%)                               | 17    |      |      |      |     | 23              |      |      |      |     | 8                  |      |      |      |     | 0                |        |
| Azathioprine/6-MP (%)                        | 34    |      |      |      |     | 35              |      |      |      |     | 31                 |      |      |      |     | 50               |        |
| Methotrexate (%)                             | 7     |      |      |      |     | 4               |      |      |      |     | 15                 |      |      |      |     | 0                |        |
| Remission (%)                                | 73    |      |      |      |     | 77              |      |      |      |     | 62                 |      |      |      |     | 100              |        |
| CRP (mg/L) (0.0-5.0)                         | 2.6   | 2.9  | 0.1  | 13.2 | n=3 | 3.0             | 2.5  | 0.1  | 10.6 | n=2 | 2.1                | 3.7  | 0.1  | 13.2 | n=1 | IBDu 1           | IBDu 2 |
| HGB (Female) (g/L) (120-150)                 | 158   | 17   | 136  | 196  |     | 160             | 17   | 141  | 196  |     | 157                | 20   | 136  | 184  |     | 154.00           | 152.00 |
| HGB (Male) (g/L) (130-170)                   | 155   | 19   | 109  | 196  |     | 153             | 22   | 109  | 196  |     | 156                | 13   | 140  | 174  |     |                  |        |
| RBC (Female) (10 <sup>12</sup> /L) (3.8-5.8) | 4.8   | 0.6  | 3.7  | 6.0  |     | 4.9             | 0.5  | 4.1  | 5.9  |     | 4.8                | 0.8  | 3.9  | 6.0  |     | 4.6              |        |
| RBC (Male) (10 <sup>12</sup> /L) (4.5-6.5)   | 4.7   | 0.6  | 3.1  | 5.9  |     | 4.7             | 0.7  | 3.1  | 5.9  |     | 4.6                | 0.6  | 3.7  | 5.3  |     |                  | 4.4    |
| HCT (Female) (L/L) (0.36-0.46)               | 0.46  | 0.06 | 0.39 | 0.57 |     | 0.46            | 0.05 | 0.40 | 0.56 |     | 0.47               | 0.06 | 0.39 | 0.57 |     | 0.44             |        |
| HCT (Male) (L/L) (0.40-0.50)                 | 0.45  | 0.06 | 0.34 | 0.59 |     | 0.45            | 0.07 | 0.34 | 0.59 |     | 0.45               | 0.04 | 0.40 | 0.50 |     |                  | 0.42   |
| MCV (fl) (83 - 101 )                         | 96    | 6    | 81   | 110  |     | 95              | 6    | 81   | 110  |     | 98                 | 5    | 93   | 107  |     | 97               | 98     |
| WBC (10 <sup>9</sup> /L) (4.0-11.0)          | 6.6   | 2.1  | 3.1  | 12.8 |     | 6.6             | 2.2  | 3.1  | 12.8 |     | 6.5                | 1.9  | 3.8  | 10.0 |     | 5.6              | 7.4    |
| NEU (10 <sup>9</sup> /L) (2.0 -7.0)          | 4.2   | 1.6  | 2.0  | 8.7  |     | 4.3             | 1.7  | 2.0  | 8.7  |     | 4.2                | 1.4  | 2.3  | 6.8  |     | 2.8              | 4.8    |
| LYM (10 <sup>9</sup> /L) (1.0 -4.0)          | 1.6   | 0.7  | 0.5  | 3.8  |     | 1.5             | 0.6  | 0.5  | 2.8  |     | 1.8                | 0.8  | 0.8  | 3.8  |     | 1.9              | 1.9    |
| MON (10 <sup>9</sup> /L) (0.2 - 1.0)         | 0.5   | 0.3  | 0.1  | 1.3  |     | 0.6             | 0.3  | 0.1  | 1.3  |     | 0.5                | 0.2  | 0.2  | 0.8  |     | 0.7              | 0.5    |
| EOS (10 <sup>9</sup> /L) (0.02-0.5 )         | 0.2   | 0.2  | 0.0  | 1.2  |     | 0.2             | 0.2  | 0.0  | 1.2  |     | 0.2                | 0.1  | 0.1  | 0.3  |     | 0.1              | 0.1    |
| BAS (10 <sup>9</sup> /L) (0.02-0.1 )         | 0.1   | 0.1  | 0.0  | 0.7  |     | 0.1             | 0.0  | 0.0  | 0.2  |     | 0.1                | 0.2  | 0.0  | 0.7  |     | 0.0              | 0.1    |
| PLT (10 <sup>9</sup> /L) (150-400)           | 219   | 79   | 77   | 450  |     | 215             | 87   | 77   | 450  |     | 226                | 67   | 91   | 376  |     | 159              | 270    |

\*Montreal CD:

The sum of percentages of L and B classification can exceed 100 percent since disease classes and modifier were counted individually.

\*CRP:

For a total number of 3 patients with IBD no CRP measurements were obtained in a 2 weeks time window in respect to the date of blood sampling.
