# Supplementary material for: Deconvolution of monocyte responses in inflammatory bowel disease reveals an IL-1 cytokine network that regulates IL-23 in genetic and acquired IL-10 resistance
Source: PubMed Central journal article supplement (PMC8108288; doi:10.1136/gutjnl-2020-321731), 2020-10-09

## Supplementary Figure 11

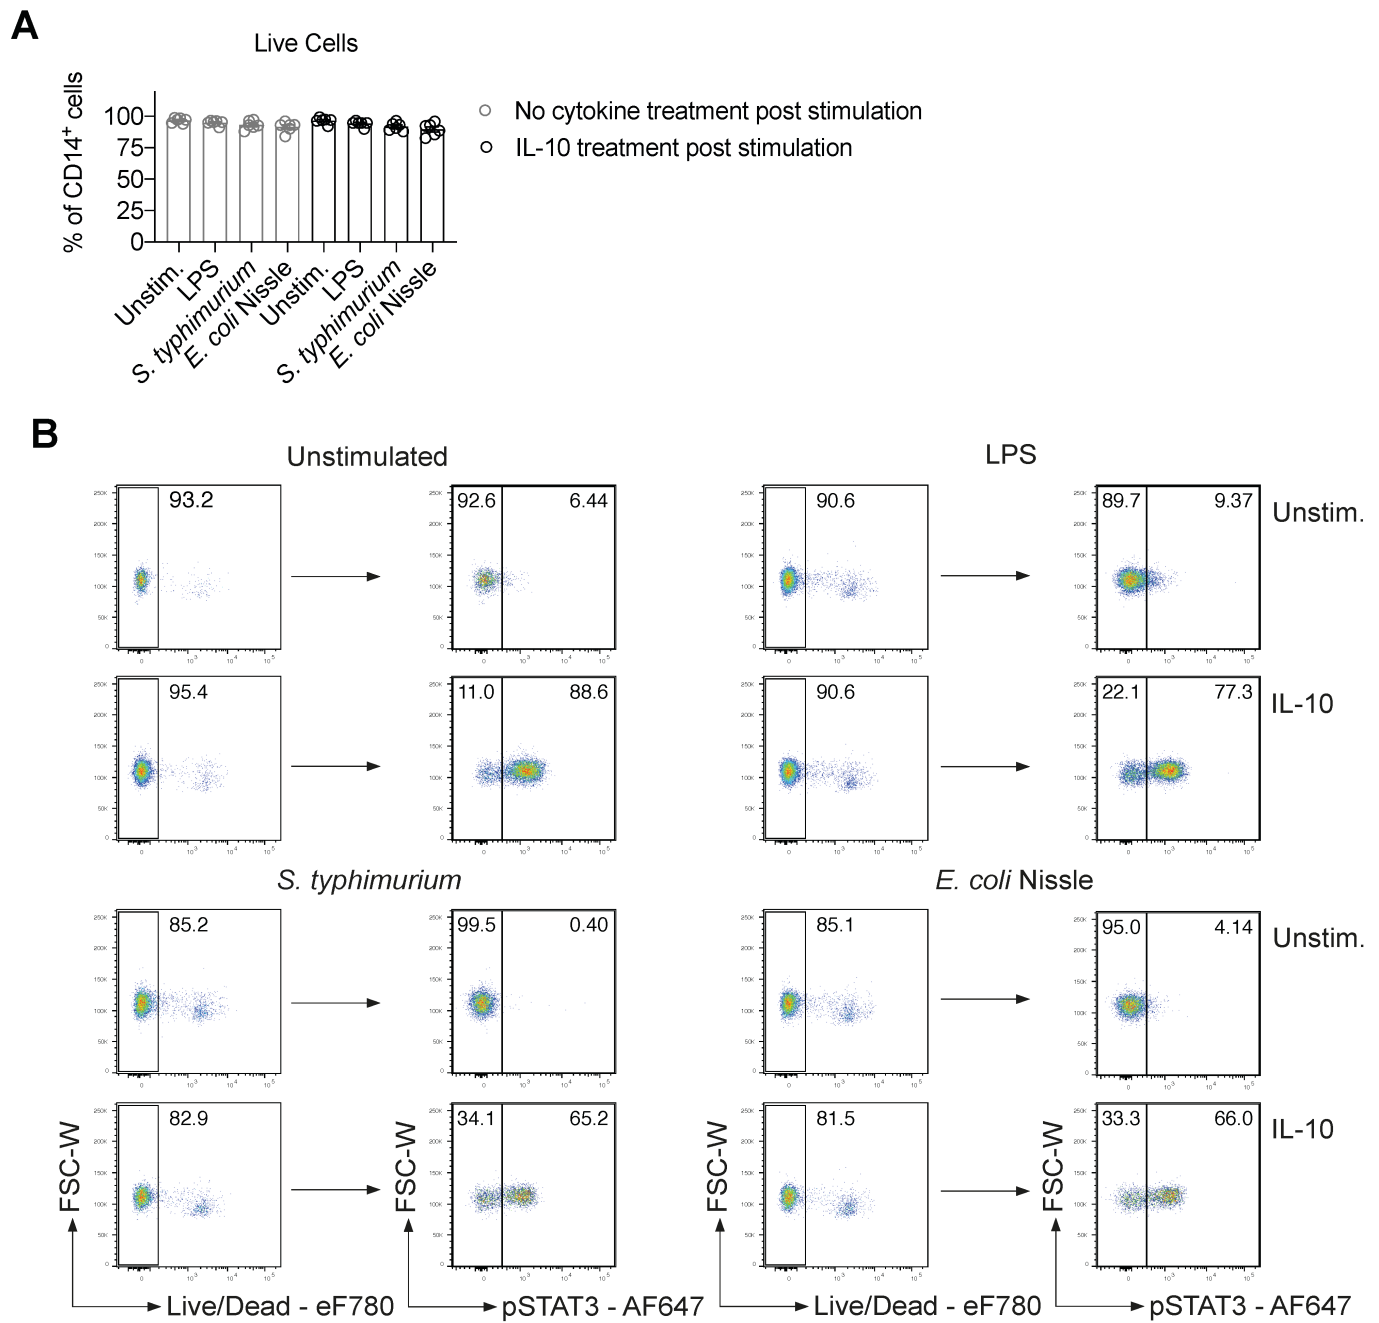

Supplement: gutjnl-2020-321731supp017.pdf [file gutjnl-2020-321731supp017.pdf]
