# Supplementary material for: Deconvolution of monocyte responses in inflammatory bowel disease reveals an IL-1 cytokine network that regulates IL-23 in genetic and acquired IL-10 resistance
Source: Gut. 2020 Oct 9;70(6):1023–36. doi: 10.1136/gutjnl-2020-321731 (PMC8108288; doi:10.1136/gutjnl-2020-321731)
Supplement: Supplementary data [file gutjnl-2020-321731supp013.xlsx]

## Sheet: module summary
Module group	WGCNA module	Name	GO category enrichments	Examples of highly correlated genes (r ≥ 0.8)	Cell type enrichments (xCell)
(i) modules correlated with Crohn's disease	antiquewhite4	ER Stress	Response to endoplasmic reticulum stress, maintenance of gastrointestinal epithelium, antigen processing and presentation, response to unfolded protein, type I interferon signalling, membrane assembly, response to chemokine	PRDX4, PYCR1, LRG1, MUC1, SRPRB, CD63	Plasma cells, Endothelial, (mac/DC)
	skyblue1	Epithelial CD9	Fatty acid derivative biosynthetic process, apical plasma membrane	ESRP1, ESRP2, SCNN1A, CD9, BDH1	Keratinocytes, (Hepatocytes)
	lavenderblush3	Anoikis	Homophilic cell adhesion via plasma membrane, regulation of anoikis, insulin secretion, regulation of exocytosis, positive regulation of angiogeneisis, regulation of exocytosis	CA1, CA2, ADORA2B, MUC4, CEACAM3/5/6/7/8, HK2	Basophils, Keratinocytes, Endothelial
	coral1	Macroautophagy	Rab/Ras protein signal transduction, autophagosome assembly, filopodium assembly, phagocytosis, neutrophil degranulation, macroautophagy	RAB14, RAB18, CDC42	Macrophages
	plum1	Biosynthesis	Amino sugar biosynthetic process, regulation of cholesterol metabolic process, thioester biosynthetic process, O-glycan processing	EHF, ITGA6, MYO1B	Smooth muscle, Fibroblasts, Preadipocytes, Chrondrocytes
(ii) modules correlated with Crohn's disease and IL-23A expression	palevioletred3	Cell Division 1	Nuclear DNA replication, DSB repair via homologous recombination, mitotic nuclear division, telomere maintenance,	FEN1, BIRC5 (Survivin), RAD51, RAN, CCNB2, CDC20, PCNA, CDC45	Erythrocytes, pro-B, CMP, Tgd
	darkolivegreen	Cell Division 2	Mitotic nuclear division, Kinetochore assembly, spindle checkpoint	BUB1, PRC1, LMNB1, CDK1, CENPF, TOP2A	Erythrocytes, Tgd, GMP, Pro B-cells, (MEP, Th2, Astrocytes)
	purple	Endothelial Act.	Extracellular matrix organization, endothelial cell proliferation, chondroitin sulfate metabolic process, positive regulation of TNF biosynthetic process, interleukin-1 production, monocyte/neutrophil extravasion, IL-33-mediated signaling pathway, regulation of macrophage activation, nerve development	CDH11, OSMR, GNA12, SH2B3, LRRK2, TLR1, TLR4, TLR5, IL33, FGFR1, RUNX1, IL1R1, LILRB1, NOTCH2, NOTCH3, IL10RA, JAK2, IL2RA, NFKB1, IL17RA, IRF4, CD11B, CD80, CSF1, CD44, MAP3K8	Endothelial, Astrocytes, Macrophages, HSC
	black	Inflam. Cytokine	Neutrophil chemotaxis, cytokine secretion, acute phase response, collagen catabolic process, detection of bacterium, complement activation, IL-1/IL-6/TNF/IFNG production	PDPN, FAP, FCGR2A (CD32), PLAU, NCF2, CSF3R, CLEC4E, CXCR2, FCGR1A (CD64), CXCR1, CHI3L1, TNFAIP6, CXCL1, MMP1, MMP3, CD274 (PDL1), IDO1, IL1B, FCN1, TLR2, XBP1, NOD2, HSPA6, SLAMF8, INHBA, CSF3, CCL2, IL6, IL8, BATF2, OSM, PTGS2, IFNG, ICAM1	Monocytes, Neutrophils, Keratinocytes, DC’s, Macrophages, Astrocytes, (GMP, Sebocytes, Melanocytes)
	darkorange2	Immune Cell Diff.	B cell activation, myeloid dendritic cell differentiation, regulatory T cell differentiation, collagen biosynthetic process, complement activation, B cell mediated immunity, isotype switching	NCF1, BATF, BATF3, PTGDS, ICAM2, RAMP3, LSP1, CD81, SPI1, CD40, KLF2, PKIG, CD79A, CCND3, NCF4	MPP, Fibroblasts, NK, CD4, DC, pDC, Tregs, CD8, Mac, Astrocytes, Mesangial
(iii) modules correlated with IL-23A expression	mediumorchid	Translation	Protein targeting to ER, ribosome assembly, cytoplasmic translation	SUMO2, NPM1, (various RPS/L genes)	GMP
	navajowhite2	mRNA Process.	Regulation of mRNA processing, tRNA modification, MDA-5 signaling pathway	IRF3, TAZ, TNFRSF14	CD8 Tem, CD4 Tcm, pro-B
	darkred	Splicing	regulation of RNA splicing, cilium movement, mRNA splice site selection, mRNA transport	OGT, IKBKB, ZNF335, PNN, STK36, HDAC6, TYK2	CD4 Tcm, CMP, Neurons
	green	Lymphocyte Diff.	T cell proliferation/differentiation, B cell proliferation/differentiation, immunological synapse formation, V(D)J recombination, leukocyte aggregation, IL-2 production, IL-4 production, response to IL-9/IL-21, T cell selection, T cell costimulation, positive regulation of natural killer cell mediated cytotoxicity	IL16, SLAMF6, PIK3CD, SP140, ITGAL, ZNF831, INPP5D, BANK1, TLR9, TLR10, CD28, ETS1, PRKCB, NLRC3, IL27RA, BTLA, BACH2, TLR6, CD22, TRAF1, CD5, NFATC1, IL21R, TIGIT, RUNX3, RHOH, RAC2, HDAC7, HDAC9, TCF4, ATM, FGFR1OP, POU2F2, CD48, PRKCQ, TNFSF8, CD6, MALT1, ZAP70, DNMT3A, UBASH3A, PLCG2, RASGRP1, PTPRC, ADCY7, CRTC3	B cells (naïve, memory, class switched), CD4 (naïve, Tcm, Tem), CD8 (Tcm, Tem), MPP, Treg, DC, Neurons
(iv) Modules correlated with the control samples (healthy donors and UC pateints).	lightpink4	Ion Transport	Ion channel complex	ABCC9, SLC9A4	-
	coral2	Neural 1	Regulation of postsynaptic membrane potential, neurotransmitter transport, fatty acid beta-oxidation, fluid transport, synaptic transmission, GABAergic	MIR192, TRPV1	-
	lightyellow	Neural 2	Tricarboxylic acid cycle, action potential, dendrite development, cell junction assembly, sphingoid metabolic process, sphingolipid biosynthetic process, JNK cascade, neuron to neuron synapse	PPARA, B3GALT5, P2RY1, DLG1, TLR3, DENND1B, APC, HNF4A, LGR4, ASAP2, EGFR, SPRED2	(Osteoblasts, platelets).
	lightsteelblue1	Epithelial Diff.	Positive regulation of sodium ion transport, tight junction assembly, embryonic digestive tract morphogenesis, intestinal epithelial cell differentiation, keratinization, epidermal cell differentiation, notch signalling pathway, positive regulation of fat cell differentiation	CDH17, MYO1D, IRF6, GPA33, LRRC19, CDH1, C1orf106, EPCAM, TUFT1, KLF4, KLF5, NR5A2, SLC22A23, AUH	Epithelial, Macrophages, Neurons, Keratinocytes,
	greenyellow	Epithelial P450	Xenobiotic metabolic process, lipid digestion, epoxygenase P450 pathway, ethanol catabolic process, drug catabolic process, brush border assembly, long-chain fatty acid catabolic process, urea cycle	BPHL, CES2, CYP2J2, MYO1A, SFRP5, IL22RA1, RORC, GPR35,	Hepatocytes
(v) Two modules associated with mitochondrial activity	brown	Mitochondrial 1	Translational initiation, mitochondrial translation, mitochondrial respiratory chain complex assembly, heme metabolic process, oxygen transport, DNA damage response [..,], protein targeting to ER, viral translation	MRPS34, MRPS12, UQCR10, FIBP, UBE2L3, GBAP1	MSC, MEP, Osteoblast, MPP, Endothelial, CD4 memory, Mac, CD8 T-cells, Th1 cells, Pericytes, (Epithelial cells)
	brown4	Mitochondrial 2	ATP synthesis coupled electron transport chain, inclusion body assembly, aerobic respiration	COX5A, RAB25, ATP5G3, AP1M2, SOD1	Macrophages, Keratinocytes, MSC
(vi) A module associated with cell growth/transcription	darkgreen	Cell growth	regulation of mRNA metabolic process, beta-catenin-TCF complex assembly, mRNA polyadenylation, TOR signaling, positive regulation of glucose import, response to transforming growth factor beta, histone lysine methylation, protein targeting to vacuole, cell cycle G1/S phase transition, androgen receptor signalling pathway, regulation of stem cell differentiation, response to leucine, phosphatidyli…	TAF2, ROCK1, ROCK2, HIPK1, TNKS2, ADAM10, SP3, FNDC3A, ZMIZ1, CPEB4, SKAP2, ZBTB38, TAB2, MAML2, AKAP11, PHACTR2	Smooth muscle, Neutrophils, Mast cells, Fibroblasts, (B-cells/NK)

## Sheet: full module membership
module	gene_id	gene_name	membership	p.value
antiquewhite4	CKAP4	CKAP4	0.914337	1.3608e-96
antiquewhite4	TMED9	TMED9	0.911481	5.93022e-95
antiquewhite4	PRDX4	PRDX4	0.908109	4.35535e-93
antiquewhite4	PYCR1	PYCR1	0.886558	1.2045e-82
antiquewhite4	C20orf24	NA	0.885252	4.40911e-82
antiquewhite4	COQ2	COQ2	0.87987	7.87004e-80
antiquewhite4	C19orf10	NA	0.872462	6.67859e-77
antiquewhite4	PDIA3	PDIA3	0.870291	4.45017e-76
antiquewhite4	LRG1	LRG1	0.869424	9.40104e-76
antiquewhite4	MUC1	MUC1	0.868611	1.88646e-75
antiquewhite4	RPN1	RPN1	0.865002	3.92765e-74
antiquewhite4	SSR3	SSR3	0.861184	8.88085e-73
antiquewhite4	CALR	CALR	0.854474	1.71029e-70
antiquewhite4	PDIA4	PDIA4	0.849591	6.67942e-69
antiquewhite4	HM13	HM13	0.849154	9.21196e-69
antiquewhite4	PPIB	PPIB	0.849082	9.71228e-69
antiquewhite4	PSMB5	PSMB5	0.848698	1.28766e-68
antiquewhite4	BACE2	BACE2	0.845135	1.6931e-67
antiquewhite4	SLC50A1	SLC50A1	0.842122	1.42188e-66
antiquewhite4	TSTA3	TSTA3	0.842053	1.49253e-66
antiquewhite4	TMED3	TMED3	0.840289	5.08168e-66
antiquewhite4	SEC61A1	SEC61A1	0.837465	3.50155e-65
antiquewhite4	SRPRB	SRPRB	0.837388	3.68844e-65
antiquewhite4	ANXA2	ANXA2	0.833802	4.05588e-64
antiquewhite4	ZG16B	ZG16B	0.833213	5.97935e-64
antiquewhite4	PDZK1IP1	PDZK1IP1	0.832797	7.85626e-64
antiquewhite4	MANF	MANF	0.828752	1.0785e-62
antiquewhite4	B9D1	B9D1	0.828556	1.22251e-62
antiquewhite4	FHL2	FHL2	0.828153	1.58046e-62
antiquewhite4	DNAJC1	DNAJC1	0.82795	1.79747e-62
antiquewhite4	RPN2	RPN2	0.827797	1.98171e-62
antiquewhite4	SEC11C	SEC11C	0.827002	3.27929e-62
antiquewhite4	AGR2	AGR2	0.826269	5.20369e-62
antiquewhite4	PIGR	PIGR	0.825398	8.98601e-62
antiquewhite4	EIF5AL1	EIF5AL1	0.824568	1.50764e-61
antiquewhite4	IFITM3	IFITM3	0.824333	1.74521e-61
antiquewhite4	TNFSF13	TNFSF13	0.824322	1.75711e-61
antiquewhite4	LCN2	LCN2	0.823639	2.68248e-61
antiquewhite4	QSOX1	QSOX1	0.817849	9.03002e-60
antiquewhite4	GMPPB	GMPPB	0.815549	3.52683e-59
antiquewhite4	SQRDL	NA	0.815349	3.96541e-59
antiquewhite4	GMDS	GMDS	0.813472	1.18705e-58
antiquewhite4	DPCD	DPCD	0.813395	1.24104e-58
antiquewhite4	TTC39A	TTC39A	0.812076	2.66154e-58
antiquewhite4	LOC653566	NA	0.812059	2.6867e-58
antiquewhite4	ALG5	ALG5	0.811439	3.83736e-58
antiquewhite4	MAGED1	MAGED1	0.8109	5.22698e-58
antiquewhite4	CD63	CD63	0.810236	7.63408e-58
antiquewhite4	SLC1A5	SLC1A5	0.810041	8.52948e-58
antiquewhite4	GPX2	GPX2	0.806733	5.50075e-57
antiquewhite4	IFITM1	IFITM1	0.806607	5.90201e-57
antiquewhite4	IGFBP2	IGFBP2	0.806252	7.19251e-57
antiquewhite4	SLC39A7	SLC39A7	0.806092	7.86196e-57
antiquewhite4	GGCT	GGCT	0.797211	9.67956e-55
antiquewhite4	SPCS2	SPCS2	0.795712	2.13001e-54
antiquewhite4	PVRL2	NA	0.795099	2.93584e-54
antiquewhite4	FLJ23867	NA	0.794668	3.67643e-54
antiquewhite4	TIMM17A	TIMM17A	0.793823	5.70165e-54
antiquewhite4	SSR4	SSR4	0.791692	1.71074e-53
antiquewhite4	SLC38A5	SLC38A5	0.789908	4.24807e-53
antiquewhite4	CRELD2	CRELD2	0.789727	4.65695e-53
antiquewhite4	WBP5	NA	0.786711	2.12267e-52
antiquewhite4	SERP1	SERP1	0.784431	6.57164e-52
antiquewhite4	SLPI	SLPI	0.784294	7.03152e-52
antiquewhite4	CDC42EP1	CDC42EP1	0.783514	1.03163e-51
antiquewhite4	IDH2	IDH2	0.782576	1.63194e-51
antiquewhite4	CARD16	CARD16	0.781285	3.0566e-51
antiquewhite4	SORD	SORD	0.780606	4.24488e-51
antiquewhite4	CBR3	CBR3	0.779466	7.35008e-51
antiquewhite4	UCHL3	UCHL3	0.778566	1.13096e-50
antiquewhite4	ANXA2P1	ANXA2P1	0.77433	8.36713e-50
antiquewhite4	NUCB2	NUCB2	0.770822	4.24809e-49
antiquewhite4	GDF15	GDF15	0.77076	4.37191e-49
antiquewhite4	GMPR	GMPR	0.76887	1.03614e-48
antiquewhite4	DNAJB11	DNAJB11	0.767757	1.71631e-48
antiquewhite4	C15orf24	NA	0.765776	4.18186e-48
antiquewhite4	MESDC2	NA	0.765433	4.87587e-48
antiquewhite4	PSMB8	PSMB8	0.763412	1.1973e-47
antiquewhite4	SENP3-EIF4A1	SENP3-EIF4A1	0.761828	2.40607e-47
antiquewhite4	LGALS9	LGALS9	0.7611	3.3099e-47
antiquewhite4	SMAGP	SMAGP	0.760773	3.81729e-47
antiquewhite4	FARSB	FARSB	0.76026	4.77539e-47
antiquewhite4	HSPA5	HSPA5	0.760218	4.86214e-47
antiquewhite4	GIPC1	GIPC1	0.758739	9.23921e-47
antiquewhite4	ASRGL1	ASRGL1	0.758342	1.09638e-46
antiquewhite4	ERLEC1	ERLEC1	0.75779	1.39056e-46
antiquewhite4	PPA1	PPA1	0.756624	2.29331e-46
antiquewhite4	RAB3D	RAB3D	0.751769	1.78729e-45
antiquewhite4	RNF186	RNF186	0.750983	2.48061e-45
antiquewhite4	SIL1	SIL1	0.750622	2.88201e-45
antiquewhite4	FAM57A	FAM57A	0.75043	3.12221e-45
antiquewhite4	ADAM15	ADAM15	0.750175	3.4699e-45
antiquewhite4	PSMA5	PSMA5	0.750002	3.72775e-45
antiquewhite4	EPS8L1	EPS8L1	0.748789	6.1558e-45
antiquewhite4	C1QB	C1QB	0.741718	1.08133e-43
antiquewhite4	PLAC8	PLAC8	0.740285	1.91077e-43
antiquewhite4	TSPAN1	TSPAN1	0.739563	2.54236e-43
antiquewhite4	EI24	EI24	0.738377	4.05603e-43
antiquewhite4	PDIA6	PDIA6	0.7373	6.18297e-43
antiquewhite4	H3F3B	H3F3B	0.736673	7.89738e-43
antiquewhite4	MRAP2	MRAP2	0.733208	3.0133e-42
antiquewhite4	GGH	GGH	0.731452	5.8928e-42
antiquewhite4	PSMG1	PSMG1	0.730087	9.89147e-42
antiquewhite4	PSMB2	PSMB2	0.729971	1.03343e-41
antiquewhite4	CCRL2	CCRL2	0.729097	1.43685e-41
antiquewhite4	BAK1	BAK1	0.729089	1.44111e-41
antiquewhite4	PSMA3	PSMA3	0.72869	1.6747e-41
antiquewhite4	O3FAR1	NA	0.727415	2.70039e-41
antiquewhite4	PMM2	PMM2	0.726235	4.19236e-41
antiquewhite4	MRPL17	MRPL17	0.722771	1.5044e-40
antiquewhite4	DNAJC12	DNAJC12	0.722544	1.63447e-40
antiquewhite4	TFF2	TFF2	0.721366	2.51243e-40
antiquewhite4	IGJ	NA	0.72101	2.85889e-40
antiquewhite4	SEPX1	NA	0.72075	3.14255e-40
antiquewhite4	PVRL4	NA	0.720555	3.37246e-40
antiquewhite4	TYROBP	TYROBP	0.719534	4.87846e-40
antiquewhite4	TMEM214	TMEM214	0.718147	8.0384e-40
antiquewhite4	C2	C2	0.71718	1.13609e-39
antiquewhite4	CSDA	NA	0.716842	1.28193e-39
antiquewhite4	PI3	PI3	0.715115	2.36839e-39
antiquewhite4	KARS	KARS	0.715093	2.38674e-39
antiquewhite4	PDIA5	PDIA5	0.714781	2.66541e-39
antiquewhite4	RAB11A	RAB11A	0.713929	3.60002e-39
antiquewhite4	TFF1	TFF1	0.713427	4.29549e-39
antiquewhite4	SRD5A3	SRD5A3	0.713363	4.39432e-39
antiquewhite4	SLC16A3	SLC16A3	0.712033	7.00273e-39
antiquewhite4	HMGB3	HMGB3	0.710849	1.05799e-38
antiquewhite4	C1GALT1C1	C1GALT1C1	0.706784	4.29605e-38
antiquewhite4	STT3A	STT3A	0.702901	1.6023e-37
antiquewhite4	FUT3	FUT3	0.702821	1.64583e-37
antiquewhite4	HSP90B1	HSP90B1	0.702252	1.99224e-37
antiquewhite4	DDOST	DDOST	0.701886	2.25197e-37
antiquewhite4	C9orf89	NA	0.701378	2.66953e-37
antiquewhite4	CCL11	CCL11	0.700771	3.26834e-37
antiquewhite4	MRPL44	MRPL44	0.700406	3.69085e-37
antiquewhite4	PHLDA2	PHLDA2	0.699943	4.30508e-37
antiquewhite4	AGTRAP	AGTRAP	0.698019	8.13477e-37
antiquewhite4	FOXA2	FOXA2	0.697677	9.10556e-37
antiquewhite4	EMP2	EMP2	0.696563	1.31232e-36
antiquewhite4	PCTP	PCTP	0.693674	3.36172e-36
antiquewhite4	LAPTM4A	LAPTM4A	0.6936	3.44372e-36
antiquewhite4	DOLK	DOLK	0.693358	3.72358e-36
antiquewhite4	RAB13	RAB13	0.692569	4.80313e-36
antiquewhite4	PSMA1	PSMA1	0.692192	5.42389e-36
antiquewhite4	GBA	GBA	0.689057	1.47733e-35
antiquewhite4	YARS	YARS	0.689009	1.50003e-35
antiquewhite4	TOMM40	TOMM40	0.688602	1.70692e-35
antiquewhite4	PLP2	PLP2	0.684014	7.2122e-35
antiquewhite4	FLOT1	FLOT1	0.683712	7.92243e-35
antiquewhite4	SAP30	SAP30	0.682868	1.02926e-34
antiquewhite4	SHB	SHB	0.682219	1.25813e-34
antiquewhite4	MFSD6L	MFSD6L	0.680989	1.83854e-34
antiquewhite4	TSPAN6	TSPAN6	0.680299	2.27255e-34
antiquewhite4	SPINK4	SPINK4	0.676573	7.06365e-34
antiquewhite4	GPBAR1	GPBAR1	0.675816	8.87705e-34
antiquewhite4	NPC2	NPC2	0.675032	1.12371e-33
antiquewhite4	TMEM70	TMEM70	0.674798	1.20557e-33
antiquewhite4	PSMB9	PSMB9	0.672303	2.53914e-33
antiquewhite4	C1QA	C1QA	0.672179	2.63441e-33
antiquewhite4	ALDH4A1	ALDH4A1	0.671819	2.93117e-33
antiquewhite4	MANEAL	MANEAL	0.670205	4.72348e-33
antiquewhite4	PREB	PREB	0.670052	4.94207e-33
antiquewhite4	RFWD2	RFWD2P1	0.669047	6.63902e-33
antiquewhite4	FLJ27352	NA	0.668558	7.66222e-33
antiquewhite4	C17orf58	C17orf58	0.667963	9.11874e-33
antiquewhite4	FAM109B	NA	0.667738	9.7391e-33
antiquewhite4	PSMD1	PSMD1	0.665963	1.63198e-32
antiquewhite4	BAIAP2L1	BAIAP2L1	0.662766	4.09987e-32
antiquewhite4	LRR1	LRR1	0.662664	4.22116e-32
antiquewhite4	HLA-B	HLA-B	0.661108	6.58105e-32
antiquewhite4	CAPN8	CAPN8	0.65968	9.86687e-32
antiquewhite4	TEAD4	TEAD4	0.658752	1.28255e-31
antiquewhite4	RTP4	RTP4	0.658513	1.37193e-31
antiquewhite4	ASGR1	ASGR1	0.657852	1.65231e-31
antiquewhite4	HLA-C	HLA-C	0.65593	2.82961e-31
antiquewhite4	RALB	RALB	0.651739	9.02605e-31
antiquewhite4	TXNDC5	TXNDC5	0.65084	1.15485e-30
antiquewhite4	PNP	PNP	0.645812	4.51184e-30
antiquewhite4	TRIP6	TRIP6	0.644323	6.72268e-30
antiquewhite4	STRAP	STRAP	0.643654	8.0364e-30
antiquewhite4	OLFM4	OLFM4	0.639254	2.57013e-29
antiquewhite4	DPP3	DPP3	0.638117	3.45962e-29
antiquewhite4	SPTSSA	SPTSSA	0.636671	5.04061e-29
antiquewhite4	TXNDC9	TXNDC9	0.635111	7.54751e-29
antiquewhite4	CREB3L1	CREB3L1	0.634831	8.11336e-29
antiquewhite4	TMBIM4	TMBIM4	0.63351	1.13957e-28
antiquewhite4	ATG3	ATG3	0.632713	1.39777e-28
antiquewhite4	CANT1	CANT1	0.6309	2.21913e-28
antiquewhite4	VAMP5	VAMP5	0.628918	3.66596e-28
antiquewhite4	LOC100134229	NA	0.628444	4.13152e-28
antiquewhite4	CCR10	CCR10	0.627609	5.09619e-28
antiquewhite4	DSTN	DSTN	0.625607	8.40947e-28
antiquewhite4	GPR56	NA	0.623972	1.26259e-27
antiquewhite4	MPV17L2	MPV17L2	0.621502	2.3225e-27
antiquewhite4	AP5S1	AP5S1	0.619805	3.51903e-27
antiquewhite4	SLC25A33	SLC25A33	0.618823	4.47112e-27
antiquewhite4	AREG	AREG	0.618246	5.14406e-27
antiquewhite4	EPHB3	EPHB3	0.616479	7.8889e-27
antiquewhite4	C2orf18	NA	0.614813	1.17771e-26
antiquewhite4	IFI6	IFI6	0.614194	1.36576e-26
antiquewhite4	CYB5R2	CYB5R2	0.610278	3.46322e-26
antiquewhite4	C14orf129	NA	0.609456	4.20353e-26
antiquewhite4	HNRNPAB	HNRNPAB	0.608007	5.90577e-26
antiquewhite4	GALE	GALE	0.60523	1.12774e-25
antiquewhite4	LRPAP1	LRPAP1	0.599248	4.44763e-25
antiquewhite4	PCCB	PCCB	0.597672	6.3538e-25
antiquewhite4	LYPD6B	LYPD6B	0.596712	7.88847e-25
antiquewhite4	KCNK6	KCNK6	0.596279	8.69502e-25
antiquewhite4	MLN	MLN	0.596041	9.17125e-25
antiquewhite4	CYCS	CYCS	0.595962	9.33676e-25
antiquewhite4	D4S234E	NA	0.594108	1.41331e-24
antiquewhite4	ALDH1L1	ALDH1L1	0.590836	2.91883e-24
antiquewhite4	ACAT2	ACAT2	0.590752	2.97334e-24
antiquewhite4	BCL10	BCL10	0.590193	3.3629e-24
antiquewhite4	EPHB2	EPHB2	0.588769	4.5964e-24
antiquewhite4	NQO1	NQO1	0.587211	6.45826e-24
antiquewhite4	KCTD14	KCTD14	0.587194	6.48214e-24
antiquewhite4	RBP4	RBP4	0.58653	7.48757e-24
antiquewhite4	CLC	CLC	0.583255	1.51879e-23
antiquewhite4	LOC100131733	NA	0.582184	1.9108e-23
antiquewhite4	KCNK1	KCNK1	0.581847	2.05331e-23
antiquewhite4	GRSF1	GRSF1	0.580497	2.73817e-23
antiquewhite4	TXNDC11	TXNDC11	0.577246	5.44545e-23
antiquewhite4	BAG3	BAG3	0.575316	8.16165e-23
antiquewhite4	SAR1A	SAR1A	0.575056	8.61707e-23
antiquewhite4	NAA20	NAA20	0.573924	1.09095e-22
antiquewhite4	B2M	B2M	0.573004	1.32058e-22
antiquewhite4	GCNT3	GCNT3	0.570884	2.04625e-22
antiquewhite4	CA4	CA4	0.569913	2.49789e-22
antiquewhite4	CCNI2	CCNI2	0.565449	6.19841e-22
antiquewhite4	MRPS30	MRPS30	0.561931	1.2564e-21
antiquewhite4	NT5C3	NA	0.558014	2.73236e-21
antiquewhite4	ATF3	ATF3	0.554241	5.72003e-21
antiquewhite4	DHCR24	DHCR24	0.553162	7.05266e-21
antiquewhite4	ARHGAP8	ARHGAP8	0.55181	9.16166e-21
antiquewhite4	MGAT1	MGAT1	0.551604	9.53136e-21
antiquewhite4	FUNDC1	FUNDC1	0.547169	2.22781e-20
antiquewhite4	AACS	AACS	0.544114	3.96932e-20
antiquewhite4	FDFT1	FDFT1	0.537843	1.27509e-19
antiquewhite4	ETV7	ETV7	0.536905	1.51518e-19
antiquewhite4	REG1A	REG1A	0.535984	1.79402e-19
antiquewhite4	MUC2	MUC2	0.533865	2.64074e-19
antiquewhite4	DCTN6	DCTN6	0.526631	9.68201e-19
antiquewhite4	LAPTM4B	LAPTM4B	0.526413	1.00637e-18
antiquewhite4	SOX9	SOX9	0.525427	1.1984e-18
antiquewhite4	MRPS28	MRPS28	0.525095	1.27076e-18
antiquewhite4	MIPEP	MIPEP	0.516721	5.46262e-18
antiquewhite4	PGAM4	PGAM4	0.514948	7.40147e-18
antiquewhite4	SLC35A4	SLC35A4	0.49571	1.78653e-16
antiquewhite4	TPD52L1	TPD52L1	0.493575	2.51297e-16
antiquewhite4	TREM2	TREM2	0.487023	7.05441e-16
antiquewhite4	SFXN2	SFXN2	0.480709	1.86817e-15
antiquewhite4	TAPBPL	TAPBPL	0.473527	5.5223e-15
antiquewhite4	CARM1	CARM1	0.472391	6.54005e-15
antiquewhite4	GTF2B	GTF2B	0.46178	3.08068e-14
antiquewhite4	LDHD	LDHD	0.451982	1.22955e-13
antiquewhite4	44089	NA	0.450574	1.49468e-13
antiquewhite4	MRPL38	MRPL38	0.442481	4.514e-13
antiquewhite4	PSMD3	PSMD3	0.441613	5.07351e-13
antiquewhite4	VBP1	VBP1	0.437531	8.74948e-13
antiquewhite4	ATG10	ATG10	0.432023	1.80447e-12
antiquewhite4	RCAN1	RCAN1	0.431925	1.82765e-12
antiquewhite4	CDCP1	CDCP1	0.420895	7.48732e-12
antiquewhite4	DHCR7	DHCR7	0.412765	2.04993e-11
antiquewhite4	TMPRSS2	TMPRSS2	0.406814	4.21243e-11
antiquewhite4	AXL	AXL	0.375596	1.46979e-09
antiquewhite4	UBE2MP1	UBE2MP1	0.352037	1.69039e-08
antiquewhite4	DNALI1	DNALI1	0.338562	6.26391e-08
antiquewhite4	HIST1H3D	HIST1H3D	0.33545	8.40375e-08
antiquewhite4	HPS6	HPS6	0.323946	2.42115e-07
antiquewhite4	GTF2E2	GTF2E2	0.317993	4.11606e-07
antiquewhite4	HPDL	HPDL	0.312168	6.84268e-07
antiquewhite4	HSP90AA1	HSP90AA1	0.306553	1.10561e-06
antiquewhite4	RNF26	RNF26	0.301873	1.6367e-06
antiquewhite4	TRIM31	TRIM31	0.267904	2.31324e-05
antiquewhite4	CCNH	CCNH	0.26348	3.18523e-05
antiquewhite4	PHF5A	PHF5A	0.238018	0.00018027
grey	DDX3Y	DDX3Y	0.997215	1.05532e-273
grey	KDM5D	KDM5D	0.994693	4.92662e-240
grey	UTY	UTY	0.99452	2.33604e-238
grey	TXLNG2P	NA	0.993581	4.1302e-230
grey	ZNF625-ZNF20	ZNF625-ZNF20	0.0240338	0.709318
grey	FAM18B2-CDRT4	NA	-0.0159827	0.804229
lavenderblush3	CA2	CA2	0.928093	2.1964e-105
lavenderblush3	ADORA2B	ADORA2B	0.896459	3.72108e-87
lavenderblush3	MUC4	MUC4	0.887418	5.08317e-83
lavenderblush3	CEACAM7	CEACAM7	0.884732	7.35432e-82
lavenderblush3	CEACAM5	CEACAM5	0.873334	3.08603e-77
lavenderblush3	MPZL2	MPZL2	0.870734	3.02873e-76
lavenderblush3	HK2	HK2	0.864889	4.31314e-74
lavenderblush3	ACVRL1	ACVRL1	0.857865	1.23929e-71
lavenderblush3	B4GALNT3	B4GALNT3	0.857151	2.16602e-71
lavenderblush3	CEACAM3	CEACAM3	0.849301	8.27194e-69
lavenderblush3	C12orf36	NA	0.846575	6.02324e-68
lavenderblush3	CD24P4	CD24P4	0.843708	4.66528e-67
lavenderblush3	CA1	CA1	0.836888	5.16924e-65
lavenderblush3	ELOVL6	ELOVL6	0.831115	2.35471e-63
lavenderblush3	PPP1R14C	PPP1R14C	0.829675	5.96989e-63
lavenderblush3	GOLM1	GOLM1	0.829333	7.43466e-63
lavenderblush3	DHDDS	DHDDS	0.828013	1.72744e-62
lavenderblush3	DHRS9	DHRS9	0.820391	1.95862e-60
lavenderblush3	RHBDL2	RHBDL2	0.819677	3.01582e-60
lavenderblush3	PARM1	PARM1	0.815969	2.75304e-59
lavenderblush3	CEACAM8	CEACAM8	0.814843	5.33617e-59
lavenderblush3	PLCD3	PLCD3	0.813891	9.30456e-59
lavenderblush3	SLC16A1	SLC16A1	0.812118	2.59702e-58
lavenderblush3	CEACAM6	CEACAM6	0.811966	2.83563e-58
lavenderblush3	OASL	OASL	0.809216	1.36276e-57
lavenderblush3	JPH1	JPH1	0.809127	1.43296e-57
lavenderblush3	WIPI1	WIPI1	0.80896	1.57541e-57
lavenderblush3	FGFBP1	FGFBP1	0.797707	7.44699e-55
lavenderblush3	CLCA4	CLCA4	0.794689	3.63544e-54
lavenderblush3	FAM118B	FAM118B	0.793639	6.27397e-54
lavenderblush3	L1TD1	L1TD1	0.785768	3.3936e-52
lavenderblush3	CA12	CA12	0.784285	7.06354e-52
lavenderblush3	FAM55D	NA	0.773504	1.23026e-49
lavenderblush3	CEACAM1	CEACAM1	0.767016	2.39703e-48
lavenderblush3	CAPN2	CAPN2	0.76639	3.17594e-48
lavenderblush3	SPAG1	SPAG1	0.762652	1.67441e-47
lavenderblush3	CD177	CD177	0.747414	1.08275e-44
lavenderblush3	CCL28	CCL28	0.744489	3.55681e-44
lavenderblush3	RIMS3	RIMS3	0.744222	3.96096e-44
lavenderblush3	APOBR	APOBR	0.737695	5.2976e-43
lavenderblush3	TLE1	TLE1	0.737265	6.26742e-43
lavenderblush3	LRFN4	LRFN4	0.733651	2.54184e-42
lavenderblush3	MUC12	MUC12	0.733122	3.11412e-42
lavenderblush3	ANO1	ANO1	0.732216	4.40398e-42
lavenderblush3	FLJ90757	NA	0.725055	6.49111e-41
lavenderblush3	ASAP3	ASAP3	0.724231	8.79844e-41
lavenderblush3	PLEKHG3	PLEKHG3	0.721527	2.369e-40
lavenderblush3	ITGB6	ITGB6	0.720155	3.89766e-40
lavenderblush3	HDAC1	HDAC1	0.713756	3.82657e-39
lavenderblush3	HYAL1	HYAL1	0.682419	1.18285e-34
lavenderblush3	EMP1	EMP1	0.670016	4.9938e-33
lavenderblush3	SLC37A2	SLC37A2	0.655665	3.04703e-31
lavenderblush3	TMEM44	TMEM44	0.650684	1.20523e-30
lavenderblush3	GPRC5A	GPRC5A	0.649578	1.62955e-30
lavenderblush3	PPME1	PPME1	0.641385	1.46686e-29
lavenderblush3	CEP70	CEP70	0.639531	2.38967e-29
lavenderblush3	VSNL1	VSNL1	0.638109	3.46736e-29
lavenderblush3	SHH	SHH	0.62666	6.46463e-28
lavenderblush3	HOXB9	HOXB9	0.60997	3.72453e-26
lavenderblush3	APIP	APIP	0.533823	2.66055e-19
lavenderblush3	TINAGL1	TINAGL1	0.502635	5.81171e-17
lavenderblush3	PRPSAP1	PRPSAP1	0.460511	3.69437e-14
lavenderblush3	MIDN	MIDN	0.458153	5.16891e-14
darkorange2	PLEKHO1	PLEKHO1	0.954725	6.87514e-129
darkorange2	NCF1C	NCF1C	0.933015	5.78408e-109
darkorange2	NCF1	NCF1	0.928971	5.27478e-106
darkorange2	NCF1B	NCF1B	0.928059	2.31941e-105
darkorange2	IGFLR1	IGFLR1	0.926362	3.46784e-104
darkorange2	HCLS1	HCLS1	0.926107	5.17851e-104
darkorange2	FERMT3	FERMT3	0.925492	1.35446e-103
darkorange2	PARVB	PARVB	0.925144	2.32433e-103
darkorange2	GYPC	GYPC	0.925021	2.80981e-103
darkorange2	BATF	BATF	0.923931	1.49628e-102
darkorange2	SLC15A3	SLC15A3	0.923525	2.77262e-102
darkorange2	LAPTM5	LAPTM5	0.923412	3.28743e-102
darkorange2	CMTM7	CMTM7	0.923087	5.37095e-102
darkorange2	FXYD5	FXYD5	0.920987	1.21076e-100
darkorange2	WAS	WAS	0.916587	6.33101e-98
darkorange2	CNN2	CNN2	0.913915	2.39703e-96
darkorange2	SELPLG	SELPLG	0.91257	1.42889e-95
darkorange2	APOBEC3F	APOBEC3F	0.912516	1.53366e-95
darkorange2	AKR1B1	AKR1B1	0.911739	4.24297e-95
darkorange2	EMP3	EMP3	0.910463	2.20846e-94
darkorange2	PTGDS	PTGDS	0.910189	3.13779e-94
darkorange2	TNFRSF4	TNFRSF4	0.909386	8.73409e-94
darkorange2	ICAM2	ICAM2	0.908297	3.44289e-93
darkorange2	GPSM3	GPSM3	0.908236	3.71741e-93
darkorange2	ARID5A	ARID5A	0.907504	9.25094e-93
darkorange2	DTNB	DTNB	0.905885	6.77252e-92
darkorange2	TSPAN4	TSPAN4	0.905115	1.72199e-91
darkorange2	ICAM3	ICAM3	0.904618	3.13525e-91
darkorange2	S1PR4	S1PR4	0.904532	3.47559e-91
darkorange2	CFP	CFP	0.903421	1.30756e-90
darkorange2	TNFAIP8L2	TNFAIP8L2	0.903369	1.39055e-90
darkorange2	RAMP3	RAMP3	0.903317	1.47968e-90
darkorange2	PCBP3	PCBP3	0.901496	1.25162e-89
darkorange2	STAT5A	STAT5A	0.901173	1.81958e-89
darkorange2	ANXA6	ANXA6	0.899729	9.55356e-89
darkorange2	LSP1	LSP1	0.899591	1.11743e-88
darkorange2	CCM2	CCM2	0.899577	1.13463e-88
darkorange2	CD81	CD81	0.898544	3.65216e-88
darkorange2	CMTM3	CMTM3	0.896986	2.07863e-87
darkorange2	ADA	ADA	0.895797	7.70078e-87
darkorange2	GMFG	GMFG	0.895062	1.71484e-86
darkorange2	PCOLCE	PCOLCE	0.894811	2.25186e-86
darkorange2	HLX	HLX	0.89458	2.89147e-86
darkorange2	NAGK	NAGK	0.893505	9.18178e-86
darkorange2	IMPDH1	IMPDH1	0.891746	5.91805e-85
darkorange2	RARRES2	RARRES2	0.89154	7.34746e-85
darkorange2	IL4I1	IL4I1	0.89064	1.8797e-84
darkorange2	RILPL2	RILPL2	0.890305	2.66143e-84
darkorange2	PKN1	PKN1	0.887513	4.6158e-83
darkorange2	DOK1	DOK1	0.887083	7.11778e-83
darkorange2	C1orf162	C1orf162	0.887015	7.62136e-83
darkorange2	SRM	SRM	0.885068	5.28406e-82
darkorange2	AKIRIN2	AKIRIN2	0.884708	7.52902e-82
darkorange2	LAT2	LAT2	0.884678	7.75375e-82
darkorange2	CAPG	CAPG	0.884541	8.87329e-82
darkorange2	MMP9	MMP9	0.884443	9.77267e-82
darkorange2	PEA15	PEA15	0.88373	1.96012e-81
darkorange2	SPI1	SPI1	0.881971	1.0718e-80
darkorange2	SHKBP1	SHKBP1	0.881393	1.86091e-80
darkorange2	CYTH4	CYTH4	0.879322	1.31585e-79
darkorange2	NECAP2	NECAP2	0.87897	1.82842e-79
darkorange2	HAPLN3	HAPLN3	0.878767	2.20919e-79
darkorange2	C17orf96	NA	0.878075	4.1962e-79
darkorange2	TMEM173	TMEM173	0.877809	5.36913e-79
darkorange2	BST2	BST2	0.877323	8.4005e-79
darkorange2	GNAI2	GNAI2	0.874927	7.42496e-78
darkorange2	LY6E	LY6E	0.87454	1.05187e-77
darkorange2	UBE2E2	UBE2E2	0.874522	1.0692e-77
darkorange2	DOK2	DOK2	0.874304	1.29939e-77
darkorange2	KCTD17	KCTD17	0.874063	1.61175e-77
darkorange2	CNP	CNP	0.873874	1.90826e-77
darkorange2	CD27	CD27	0.873338	3.07628e-77
darkorange2	MAD2L2	MAD2L2	0.872209	8.34099e-77
darkorange2	FSCN1	FSCN1	0.872176	8.58518e-77
darkorange2	ABI3	ABI3	0.872176	8.58884e-77
darkorange2	DARC	NA	0.871044	2.31248e-76
darkorange2	CCND3	CCND3	0.870746	2.99656e-76
darkorange2	ST3GAL5	ST3GAL5	0.870722	3.06072e-76
darkorange2	SLC2A6	SLC2A6	0.870134	5.09458e-76
darkorange2	GBGT1	GBGT1	0.868573	1.94749e-75
darkorange2	UCP2	UCP2	0.86752	4.7665e-75
darkorange2	TRPV2	TRPV2	0.86734	5.5485e-75
darkorange2	BLVRA	BLVRA	0.867202	6.23479e-75
darkorange2	MSC	MSC	0.866809	8.68134e-75
darkorange2	DCPS	DCPS	0.865855	1.93132e-74
darkorange2	TGFB1	TGFB1	0.863812	1.0486e-73
darkorange2	FLOT2	FLOT2	0.862837	2.32757e-73
darkorange2	PNOC	PNOC	0.861328	7.90584e-73
darkorange2	CSTA	CSTA	0.860621	1.39556e-72
darkorange2	NCF4	NCF4	0.858809	5.89394e-72
darkorange2	C1R.1	NA	0.856942	2.54866e-71
darkorange2	RAB34	RAB34	0.8569	2.63411e-71
darkorange2	COTL1	COTL1	0.855716	6.59091e-71
darkorange2	CD40	CD40	0.85528	9.21852e-71
darkorange2	NFKBIE	NFKBIE	0.854912	1.2231e-70
darkorange2	BGN	BGN	0.854762	1.37257e-70
darkorange2	PTPN6	PTPN6	0.854738	1.39786e-70
darkorange2	ARHGDIB	ARHGDIB	0.853791	2.878e-70
darkorange2	APOE	APOE	0.853776	2.91102e-70
darkorange2	RBP5	RBP5	0.853656	3.18845e-70
darkorange2	LPCAT1	LPCAT1	0.852786	6.16358e-70
darkorange2	KLF2	KLF2	0.852266	9.11957e-70
darkorange2	TNFSF12	TNFSF12	0.851576	1.53e-69
darkorange2	SLC43A3	SLC43A3	0.851574	1.53238e-69
darkorange2	ABHD8	ABHD8	0.851264	1.93182e-69
darkorange2	ISLR	ISLR	0.850949	2.44185e-69
darkorange2	BASP1	BASP1	0.850346	3.82227e-69
darkorange2	LDHB	LDHB	0.850302	3.94993e-69
darkorange2	PGF	PGF	0.850226	4.17771e-69
darkorange2	NNMT	NNMT	0.849713	6.10548e-69
darkorange2	LY96	LY96	0.848802	1.19266e-68
darkorange2	LYL1	LYL1	0.848438	1.5571e-68
darkorange2	DBNL	DBNL	0.847983	2.16955e-68
darkorange2	PKIG	PKIG	0.846655	5.6852e-68
darkorange2	CTSH	CTSH	0.846541	6.17099e-68
darkorange2	ANKRD65	ANKRD65	0.846031	8.91102e-68
darkorange2	PHLDA3	PHLDA3	0.844907	1.99248e-67
darkorange2	CTLA4	CTLA4	0.844035	3.70099e-67
darkorange2	KLHDC7B	KLHDC7B	0.843639	4.89959e-67
darkorange2	CERS5	CERS5	0.843466	5.53463e-67
darkorange2	TESC	TESC	0.842753	9.14373e-67
darkorange2	SH2D2A	SH2D2A	0.842565	1.04309e-66
darkorange2	ZNF385A	ZNF385A	0.842431	1.14588e-66
darkorange2	TIMP1	TIMP1	0.842131	1.41371e-66
darkorange2	GPX7	GPX7	0.841859	1.70955e-66
darkorange2	GPR132	GPR132	0.841243	2.62417e-66
darkorange2	TMEM109	TMEM109	0.840793	3.58608e-66
darkorange2	MAP7D1	MAP7D1	0.840181	5.47351e-66
darkorange2	NRSN2	NRSN2	0.840131	5.66752e-66
darkorange2	SH2B2	SH2B2	0.840007	6.17161e-66
darkorange2	OAZ2	OAZ2	0.839878	6.74401e-66
darkorange2	NXN	NXN	0.838468	1.77115e-65
darkorange2	ITGB2	ITGB2	0.837561	3.28187e-65
darkorange2	FHL3	FHL3	0.836895	5.14712e-65
darkorange2	IL3RA	IL3RA	0.836305	7.65754e-65
darkorange2	NUP93	NUP93	0.836196	8.23592e-65
darkorange2	KMO	KMO	0.835227	1.57524e-64
darkorange2	NINJ2	NINJ2	0.835039	1.78552e-64
darkorange2	R3HDM4	R3HDM4	0.834641	2.3268e-64
darkorange2	WDR77	WDR77	0.833601	4.63193e-64
darkorange2	RBPMS	RBPMS	0.833391	5.31902e-64
darkorange2	PTGES	PTGES	0.83235	1.05326e-63
darkorange2	MAGEH1	MAGEH1	0.832024	1.30338e-63
darkorange2	PLA2G2D	PLA2G2D	0.831409	1.94499e-63
darkorange2	C1orf216	C1orf216	0.831178	2.26119e-63
darkorange2	RUVBL1	RUVBL1	0.830676	3.12891e-63
darkorange2	FTSJ1	FTSJ1	0.83055	3.39575e-63
darkorange2	CPNE5	CPNE5	0.829953	4.99188e-63
darkorange2	PLEKHO2	PLEKHO2	0.829744	5.71023e-63
darkorange2	S100A4	S100A4	0.829381	7.20771e-63
darkorange2	TOX2	TOX2	0.828737	1.08854e-62
darkorange2	LINC00094	NA	0.828482	1.28114e-62
darkorange2	ANAPC7	ANAPC7	0.828151	1.58236e-62
darkorange2	BCL2A1	BCL2A1	0.827023	3.23588e-62
darkorange2	C4A	C4A	0.826012	6.1142e-62
darkorange2	SERPINF1	SERPINF1	0.825424	8.84172e-62
darkorange2	LAIR1	LAIR1	0.824528	1.5461e-61
darkorange2	TUBB6	TUBB6	0.824168	1.93347e-61
darkorange2	C4B	C4B	0.824123	1.98714e-61
darkorange2	B3GALT6	B3GALT6	0.823813	2.40816e-61
darkorange2	CLEC2B	CLEC2B	0.823662	2.64436e-61
darkorange2	CITED4	CITED4	0.823412	3.08632e-61
darkorange2	KLHDC8B	KLHDC8B	0.823076	3.79648e-61
darkorange2	C1orf38	NA	0.822837	4.39892e-61
darkorange2	GLT25D1	NA	0.822795	4.51315e-61
darkorange2	ALOX5AP	ALOX5AP	0.820969	1.37878e-60
darkorange2	ZNF467	ZNF467	0.820887	1.44966e-60
darkorange2	CHI3L2	CHI3L2	0.81999	2.49712e-60
darkorange2	LOC729678	NA	0.819533	3.28889e-60
darkorange2	A4GALT	A4GALT	0.819366	3.63762e-60
darkorange2	FAM167B	FAM167B	0.818887	4.85257e-60
darkorange2	GJA4	GJA4	0.818414	6.44231e-60
darkorange2	TNFRSF18	TNFRSF18	0.81821	7.28019e-60
darkorange2	GM2A	GM2A	0.818207	7.29033e-60
darkorange2	FAM89B	FAM89B	0.817927	8.61713e-60
darkorange2	EFEMP2	EFEMP2	0.816743	1.74265e-59
darkorange2	ACP5	ACP5	0.815657	3.30782e-59
darkorange2	IKBKE	IKBKE	0.814522	6.43833e-59
darkorange2	FUT7	FUT7	0.814422	6.82727e-59
darkorange2	LMO2	LMO2	0.814133	8.07983e-59
darkorange2	MZB1	MZB1	0.81402	8.63003e-59
darkorange2	TNFSF13B	TNFSF13B	0.813337	1.28356e-58
darkorange2	LILRB4	LILRB4	0.813215	1.3781e-58
darkorange2	MEI1	MEI1	0.812669	1.89037e-58
darkorange2	LTB	LTB	0.81213	2.57905e-58
darkorange2	NEIL2	NEIL2	0.811832	3.06169e-58
darkorange2	RHEBL1	RHEBL1	0.811449	3.81539e-58
darkorange2	RNF122	RNF122	0.810665	5.97619e-58
darkorange2	PRCP	PRCP	0.810558	6.3538e-58
darkorange2	CHST12	CHST12	0.810522	6.48563e-58
darkorange2	PTGIR	PTGIR	0.810492	6.59745e-58
darkorange2	TSPAN33	TSPAN33	0.810398	6.95982e-58
darkorange2	TOR3A	TOR3A	0.810298	7.37075e-58
darkorange2	RGS16	RGS16	0.809497	1.16202e-57
darkorange2	SMG9	SMG9	0.809304	1.29633e-57
darkorange2	CD300LF	CD300LF	0.809181	1.38961e-57
darkorange2	SPHK1	SPHK1	0.808355	2.2156e-57
darkorange2	CSK	CSK	0.807553	3.47841e-57
darkorange2	SERPING1	SERPING1	0.80656	6.05821e-57
darkorange2	NAP1L1	NAP1L1	0.806552	6.08557e-57
darkorange2	PITPNC1	PITPNC1	0.80649	6.30206e-57
darkorange2	CD79A	CD79A	0.80632	6.92633e-57
darkorange2	SOD3	SOD3	0.806204	7.38983e-57
darkorange2	KCNN4	KCNN4	0.805816	9.16797e-57
darkorange2	SEMA4A	SEMA4A	0.805305	1.21645e-56
darkorange2	LTA	LTA	0.80429	2.13027e-56
darkorange2	STAC3	STAC3	0.803259	3.74857e-56
darkorange2	RPA2	RPA2	0.802695	5.10231e-56
darkorange2	PDLIM4	PDLIM4	0.802665	5.1862e-56
darkorange2	CX3CL1	CX3CL1	0.802428	5.90131e-56
darkorange2	MPV17	MPV17	0.802332	6.21696e-56
darkorange2	MOB3A	MOB3A	0.801741	8.57113e-56
darkorange2	MTHFD1L	MTHFD1L	0.801575	9.3773e-56
darkorange2	CSRP2	CSRP2	0.801456	9.99964e-56
darkorange2	LEPRE1	NA	0.800989	1.28744e-55
darkorange2	BATF3	BATF3	0.8007	1.50407e-55
darkorange2	IFITM2	IFITM2	0.799947	2.25494e-55
darkorange2	MFSD12	MFSD12	0.799535	2.81196e-55
darkorange2	LOC606724	NA	0.798415	5.11341e-55
darkorange2	CCL22	CCL22	0.798201	5.72837e-55
darkorange2	LY86	LY86	0.798088	6.08512e-55
darkorange2	HLA-DPB1	HLA-DPB1	0.797721	7.39058e-55
darkorange2	MFAP2	MFAP2	0.795933	1.89721e-54
darkorange2	DDX28	DDX28	0.795492	2.39056e-54
darkorange2	CLU	CLU	0.795368	2.55102e-54
darkorange2	SHMT2	SHMT2	0.795278	2.67368e-54
darkorange2	ITGB1BP1	ITGB1BP1	0.795044	3.02187e-54
darkorange2	C1QTNF1	C1QTNF1	0.794837	3.36648e-54
darkorange2	HMGN3	HMGN3	0.79446	4.09653e-54
darkorange2	DNASE2	DNASE2	0.794125	4.87572e-54
darkorange2	LOC100507463	NA	0.794047	5.07598e-54
darkorange2	SLC29A3	SLC29A3	0.793012	8.6779e-54
darkorange2	VOPP1	VOPP1	0.792915	9.11983e-54
darkorange2	AEBP1	AEBP1	0.791588	1.80387e-53
darkorange2	BIN1	BIN1	0.791353	2.0352e-53
darkorange2	TCEAL3	TCEAL3	0.790869	2.606e-53
darkorange2	LST1	LST1	0.790545	3.07371e-53
darkorange2	GRASP	GRASP	0.790131	3.79462e-53
darkorange2	PTGER1	PTGER1	0.789525	5.16023e-53
darkorange2	EBI3	EBI3	0.789429	5.41534e-53
darkorange2	APOC1	APOC1	0.788765	7.57704e-53
darkorange2	C9orf30	NA	0.78779	1.23725e-52
darkorange2	FOXP3	FOXP3	0.787666	1.31646e-52
darkorange2	ARMCX6	ARMCX6	0.787532	1.40781e-52
darkorange2	SMYD5	SMYD5	0.787391	1.51065e-52
darkorange2	DUS2L	NA	0.787136	1.71677e-52
darkorange2	MGP	MGP	0.78698	1.85608e-52
darkorange2	MAPKAPK2	MAPKAPK2	0.786869	1.9618e-52
darkorange2	TUBB	TUBB	0.786601	2.24177e-52
darkorange2	LINC00152	NA	0.786599	2.24385e-52
darkorange2	SIGLEC7	SIGLEC7	0.786384	2.49848e-52
darkorange2	CCL17	CCL17	0.785441	3.99002e-52
darkorange2	KIAA0930	KIAA0930	0.785161	4.58355e-52
darkorange2	L3MBTL2	L3MBTL2	0.784821	5.42223e-52
darkorange2	TNFRSF1B	TNFRSF1B	0.783563	1.00682e-51
darkorange2	HSD17B14	HSD17B14	0.781667	2.53964e-51
darkorange2	C14orf169	NA	0.781192	3.19737e-51
darkorange2	CD52	CD52	0.781025	3.46719e-51
darkorange2	RASIP1	RASIP1	0.780767	3.92682e-51
darkorange2	TRPM2	TRPM2	0.780517	4.43086e-51
darkorange2	MAN2B1	MAN2B1	0.779616	6.83797e-51
darkorange2	PPAN	PPAN	0.77819	1.35315e-50
darkorange2	CERS4	CERS4	0.777724	1.68922e-50
darkorange2	PPT1	PPT1	0.777081	2.29235e-50
darkorange2	LOC541471	NA	0.777021	2.35894e-50
darkorange2	NOP56	NOP56	0.774968	6.20823e-50
darkorange2	APOL3	APOL3	0.773528	1.2161e-49
darkorange2	FLT3LG	FLT3LG	0.773367	1.31081e-49
darkorange2	CDC25B	CDC25B	0.773264	1.37528e-49
darkorange2	DBN1	DBN1	0.772981	1.56847e-49
darkorange2	TFEB	TFEB	0.772555	1.9112e-49
darkorange2	CD97	NA	0.772439	2.01662e-49
darkorange2	IGLL5	IGLL5	0.772338	2.11255e-49
darkorange2	CCDC28B	CCDC28B	0.771431	3.21079e-49
darkorange2	PTP4A3	PTP4A3	0.771281	3.44067e-49
darkorange2	GPATCH4	GPATCH4	0.770653	4.59117e-49
darkorange2	SLC27A1	SLC27A1	0.769584	7.48645e-49
darkorange2	TBC1D10A	TBC1D10A	0.769537	7.64654e-49
darkorange2	CDKN2D	CDKN2D	0.768935	1.00605e-48
darkorange2	FOXS1	FOXS1	0.767691	1.7676e-48
darkorange2	ARPC1B	ARPC1B	0.767345	2.06664e-48
darkorange2	PDLIM7	PDLIM7	0.766859	2.57271e-48
darkorange2	S1PR2	S1PR2	0.766633	2.84738e-48
darkorange2	UBE2I	UBE2I	0.765916	3.92798e-48
darkorange2	TRIB3	TRIB3	0.765481	4.77283e-48
darkorange2	CH25H	CH25H	0.76458	7.13266e-48
darkorange2	TACC3	TACC3	0.764465	7.50547e-48
darkorange2	TRAF2	TRAF2	0.764375	7.81192e-48
darkorange2	TCOF1	TCOF1	0.763651	1.07715e-47
darkorange2	PTPRCAP	PTPRCAP	0.762712	1.63069e-47
darkorange2	LOC339803	NA	0.762092	2.14295e-47
darkorange2	CPZ	CPZ	0.761939	2.29165e-47
darkorange2	LDOC1	LDOC1	0.761934	2.29614e-47
darkorange2	MANBA	MANBA	0.761711	2.53271e-47
darkorange2	NAPSB	NAPSB	0.761355	2.96065e-47
darkorange2	RNASEH2B	RNASEH2B	0.76088	3.6428e-47
darkorange2	RGS10	RGS10	0.760817	3.74508e-47
darkorange2	NT5DC2	NT5DC2	0.760571	4.16947e-47
darkorange2	PUS1	PUS1	0.760394	4.50449e-47
darkorange2	TMEM39B	TMEM39B	0.76036	4.5709e-47
darkorange2	TMEM121	TMEM121	0.760285	4.72371e-47
darkorange2	GNGT2	GNGT2	0.75984	5.73243e-47
darkorange2	TMEM107	TMEM107	0.757908	1.32216e-46
darkorange2	BYSL	BYSL	0.757621	1.49595e-46
darkorange2	C16orf74	C16orf74	0.757518	1.56347e-46
darkorange2	PTPN2	PTPN2	0.757211	1.78337e-46
darkorange2	TNFAIP8L1	TNFAIP8L1	0.757099	1.87175e-46
darkorange2	LGALS1	LGALS1	0.756421	2.50147e-46
darkorange2	C16orf86	C16orf86	0.755844	3.19978e-46
darkorange2	CETP	CETP	0.755691	3.41576e-46
darkorange2	PLEKHF1	PLEKHF1	0.755232	4.15179e-46
darkorange2	44078	NA	0.753401	9.01166e-46
darkorange2	G6PD	G6PD	0.752448	1.34489e-45
darkorange2	MAL	MAL	0.752318	1.42026e-45
darkorange2	TYMP	TYMP	0.751518	1.98451e-45
darkorange2	C5orf39	NA	0.750759	2.72276e-45
darkorange2	ATP6V0E2	ATP6V0E2	0.750646	2.85344e-45
darkorange2	ADSL	ADSL	0.750626	2.8778e-45
darkorange2	IL18BP	IL18BP	0.75007	3.62486e-45
darkorange2	TIFAB	TIFAB	0.749951	3.80853e-45
darkorange2	GLIPR2	GLIPR2	0.749819	4.0218e-45
darkorange2	IGHV1OR15-1	IGHV1OR15-1	0.749697	4.23086e-45
darkorange2	AIF1	AIF1	0.748529	6.8517e-45
darkorange2	FAM26F	NA	0.748309	7.49892e-45
darkorange2	AOAH	AOAH	0.747887	8.92076e-45
darkorange2	SOCS1	SOCS1	0.747245	1.16038e-44
darkorange2	LYAR	LYAR	0.746734	1.42974e-44
darkorange2	S100A3	S100A3	0.74649	1.57962e-44
darkorange2	GZMB	GZMB	0.745973	1.94964e-44
darkorange2	FUS	FUS	0.745766	2.12023e-44
darkorange2	FAM89A	FAM89A	0.745284	2.57868e-44
darkorange2	NPRL3	NPRL3	0.745246	2.61842e-44
darkorange2	RRAGD	RRAGD	0.745226	2.64025e-44
darkorange2	POLB	POLB	0.744934	2.97081e-44
darkorange2	UTP3	UTP3	0.744652	3.32967e-44
darkorange2	WTAP	WTAP	0.743792	4.71098e-44
darkorange2	DERL3	DERL3	0.74335	5.62655e-44
darkorange2	PTDSS1	PTDSS1	0.743308	5.72366e-44
darkorange2	ATP6V1G1	ATP6V1G1	0.742859	6.85223e-44
darkorange2	FAM127A	NA	0.742205	8.90184e-44
darkorange2	LTF	LTF	0.741433	1.21143e-43
darkorange2	SERPINE2	SERPINE2	0.740996	1.44164e-43
darkorange2	SLC1A4	SLC1A4	0.740338	1.87127e-43
darkorange2	RRS1	RRS1	0.739894	2.23125e-43
darkorange2	TOP1MT	TOP1MT	0.739815	2.30148e-43
darkorange2	MDFI	MDFI	0.739695	2.4135e-43
darkorange2	RAMP2	RAMP2	0.73956	2.54508e-43
darkorange2	ACD	ACD	0.738536	3.80946e-43
darkorange2	PRAM1	PRAM1	0.738272	4.22665e-43
darkorange2	HK1	HK1	0.738042	4.62412e-43
darkorange2	APOC1P1	APOC1P1	0.737921	4.84998e-43
darkorange2	CST7	CST7	0.737067	6.77256e-43
darkorange2	FLJ35776	NA	0.736738	7.6988e-43
darkorange2	C10orf10	C10orf105	0.736402	8.77413e-43
darkorange2	TPST2	TPST2	0.736201	9.48996e-43
darkorange2	PELP1	PELP1	0.735793	1.1117e-42
darkorange2	MMP19	MMP19	0.73563	1.18435e-42
darkorange2	LCNL1	LCNL1	0.735426	1.28184e-42
darkorange2	RPL4	RPL4	0.73479	1.63928e-42
darkorange2	LAT	LAT	0.734411	1.89763e-42
darkorange2	DNAJC5B	DNAJC5B	0.733735	2.46144e-42
darkorange2	ZYX	ZYX	0.733666	2.52799e-42
darkorange2	POLR1E	POLR1E	0.732659	3.71828e-42
darkorange2	PTRF	NA	0.732289	4.28295e-42
darkorange2	CMKLR1	CMKLR1	0.731597	5.57702e-42
darkorange2	HARS	HARS	0.731431	5.94088e-42
darkorange2	GDPD5	GDPD5	0.730641	8.01852e-42
darkorange2	HCG26	NA	0.730444	8.64132e-42
darkorange2	LRRC20	LRRC20	0.729147	1.4101e-41
darkorange2	IL34	IL34	0.728941	1.52396e-41
darkorange2	RTN2	RTN2	0.728408	1.86195e-41
darkorange2	LAYN	LAYN	0.72815	2.05069e-41
darkorange2	ECSCR.1	NA	0.727939	2.21941e-41
darkorange2	NT5C3L	NA	0.727918	2.23749e-41
darkorange2	FES	FES	0.727348	2.76914e-41
darkorange2	STK40	STK40	0.726638	3.60872e-41
darkorange2	EIF2B3	EIF2B3	0.726438	3.88737e-41
darkorange2	ZDHHC18	ZDHHC18	0.726323	4.05635e-41
darkorange2	IGH@	NA	0.725863	4.81283e-41
darkorange2	CD300A	CD300A	0.7255	5.50628e-41
darkorange2	LEPREL2	NA	0.72404	9.43989e-41
darkorange2	VNN2	VNN2	0.723069	1.34862e-40
darkorange2	MILR1	MILR1	0.722314	1.77827e-40
darkorange2	TBX21	TBX21	0.721076	2.79172e-40
darkorange2	B4GALT3	B4GALT3	0.720816	3.06743e-40
darkorange2	ISG20	ISG20	0.720663	3.24255e-40
darkorange2	C1orf54	C1orf54	0.720422	3.53886e-40
darkorange2	TPM2	TPM2	0.720406	3.56019e-40
darkorange2	RGCC	RGCC	0.71791	8.75147e-40
darkorange2	RRP12	RRP12	0.717569	9.88783e-40
darkorange2	EAF2	EAF2	0.716836	1.28489e-39
darkorange2	HLA-DMA	HLA-DMA	0.716759	1.32036e-39
darkorange2	RELA	RELA	0.716673	1.36167e-39
darkorange2	IGL@	NA	0.716562	1.41647e-39
darkorange2	CTU2	CTU2	0.714978	2.48634e-39
darkorange2	CCL18	CCL18	0.714395	3.05521e-39
darkorange2	SLC2A3	SLC2A3	0.714379	3.07184e-39
darkorange2	PLEKHA4	PLEKHA4	0.713487	4.20649e-39
darkorange2	LIMS2	LIMS2	0.713198	4.65605e-39
darkorange2	TSC22D4	TSC22D4	0.712156	6.70714e-39
darkorange2	UBE2Z	UBE2Z	0.711873	7.40507e-39
darkorange2	CNRIP1	CNRIP1	0.710581	1.16113e-38
darkorange2	CARD9	CARD9	0.710116	1.36465e-38
darkorange2	METTL1	METTL1	0.709409	1.74292e-38
darkorange2	PRKCDBP	NA	0.707161	3.77676e-38
darkorange2	ZC3HC1	ZC3HC1	0.706602	4.57184e-38
darkorange2	FLJ39051	NA	0.705713	6.19033e-38
darkorange2	HDAC3	HDAC3	0.705009	7.86275e-38
darkorange2	RRP36	RRP36	0.703449	1.33243e-37
darkorange2	UTP18	UTP18	0.703352	1.37658e-37
darkorange2	SF3A3	SF3A3	0.703334	1.38495e-37
darkorange2	SLC4A5	SLC4A5	0.702828	1.64202e-37
darkorange2	PHGDH	PHGDH	0.702721	1.70225e-37
darkorange2	LARP6	LARP6	0.702543	1.8066e-37
darkorange2	POLR3D	POLR3D	0.702534	1.81212e-37
darkorange2	MRFAP1L1	MRFAP1L1	0.702238	2.0016e-37
darkorange2	TCEAL4	TCEAL4	0.70185	2.27917e-37
darkorange2	C6orf48	C6orf48	0.701058	2.97046e-37
darkorange2	IGK@	NA	0.700865	3.16767e-37
darkorange2	EHD1	EHD1	0.700336	3.77819e-37
darkorange2	ASNS	ASNS	0.699637	4.76548e-37
darkorange2	DPH5	DPH5	0.699243	5.42925e-37
darkorange2	SNX11	SNX11	0.698779	6.33048e-37
darkorange2	GATA3	GATA3	0.698294	7.43018e-37
darkorange2	COL6A2	COL6A2	0.698095	7.93301e-37
darkorange2	INSL3	INSL3	0.698041	8.07754e-37
darkorange2	LOC100506844	NA	0.69704	1.12254e-36
darkorange2	AEN	AEN	0.695446	1.89065e-36
darkorange2	MIER2	MIER2	0.694525	2.55128e-36
darkorange2	C15orf39	C15orf39	0.694217	2.81953e-36
darkorange2	PRRX2	PRRX2	0.693158	3.97244e-36
darkorange2	BLOC1S2	BLOC1S2	0.691411	6.96879e-36
darkorange2	FZD2	FZD2	0.690293	9.96512e-36
darkorange2	IGLL1	IGLL1	0.689823	1.15768e-35
darkorange2	SPAG4	SPAG4	0.689459	1.30009e-35
darkorange2	RABL5	NA	0.689223	1.40122e-35
darkorange2	CD3D	CD3D	0.688648	1.68221e-35
darkorange2	HTRA2	HTRA2	0.688066	2.02224e-35
darkorange2	AMICA1	NA	0.687263	2.60641e-35
darkorange2	SOX18	SOX18	0.685626	4.35893e-35
darkorange2	SHISA4	SHISA4	0.685498	4.53841e-35
darkorange2	TTLL1	TTLL1	0.685108	5.12683e-35
darkorange2	THAP11	THAP11	0.684706	5.81243e-35
darkorange2	FAM116B	NA	0.683333	8.91057e-35
darkorange2	RAB12	RAB12	0.681814	1.426e-34
darkorange2	NOP58	NOP58	0.681564	1.54037e-34
darkorange2	PDE6G	PDE6G	0.680266	2.29528e-34
darkorange2	APEX1	APEX1	0.679937	2.53865e-34
darkorange2	ARL6IP5	ARL6IP5	0.679827	2.62608e-34
darkorange2	SAE1	SAE1	0.679429	2.96573e-34
darkorange2	SOX12	SOX12	0.677346	5.59011e-34
darkorange2	NASP	NASP	0.676109	8.12609e-34
darkorange2	CCDC71L	CCDC71L	0.675847	8.79455e-34
darkorange2	LOC100134361	NA	0.67455	1.29846e-33
darkorange2	CRSP8P	NA	0.67452	1.3101e-33
darkorange2	MYBL2	MYBL2	0.674159	1.45988e-33
darkorange2	INS-IGF2	INS-IGF2	0.673253	1.91334e-33
darkorange2	MRPS27	MRPS27	0.672774	2.20714e-33
darkorange2	ORAI3	ORAI3	0.671752	2.99044e-33
darkorange2	PHF11	PHF11	0.671745	2.99669e-33
darkorange2	FAM127C	NA	0.67157	3.15552e-33
darkorange2	LOC283710	NA	0.670293	4.60312e-33
darkorange2	RRAD	RRAD	0.670041	4.9578e-33
darkorange2	LOC100506714	NA	0.668696	7.35862e-33
darkorange2	SLC38A6	SLC38A6	0.66841	8.0015e-33
darkorange2	GPR68	GPR68	0.668331	8.1898e-33
darkorange2	RFC4	RFC4	0.668106	8.7466e-33
darkorange2	MADCAM1	MADCAM1	0.667945	9.16786e-33
darkorange2	RELB	RELB	0.665818	1.70208e-32
darkorange2	VMA21	VMA21	0.665653	1.78556e-32
darkorange2	GNG8	GNG8	0.663516	3.30635e-32
darkorange2	NOC2L	NOC2L	0.663245	3.57372e-32
darkorange2	CRTAP	CRTAP	0.661723	5.52262e-32
darkorange2	ST6GALNAC4	ST6GALNAC4	0.660711	7.36649e-32
darkorange2	RAD51C	RAD51C	0.66007	8.83642e-32
darkorange2	PDCD2L	PDCD2L	0.659749	9.67606e-32
darkorange2	SKAP1	SKAP1	0.659509	1.03564e-31
darkorange2	C10orf11	NA	0.659136	1.15077e-31
darkorange2	IL2RG	IL2RG	0.658805	1.26367e-31
darkorange2	WNT5B	WNT5B	0.656908	2.1532e-31
darkorange2	C21orf63	NA	0.656759	2.24476e-31
darkorange2	ODF3B	ODF3B	0.65672	2.26932e-31
darkorange2	VARS	VARS	0.656091	2.70558e-31
darkorange2	KCTD11	KCTD11	0.652616	7.09199e-31
darkorange2	RTEL1-TNFRSF6B	RTEL1-TNFRSF6B	0.652085	8.20651e-31
darkorange2	FKBP11	FKBP11	0.651551	9.50349e-31
darkorange2	RAP2B	RAP2B	0.651225	1.03926e-30
darkorange2	PRF1	PRF1	0.650533	1.25582e-30
darkorange2	RPUSD4	RPUSD4	0.649116	1.84832e-30
darkorange2	PLD3	PLD3	0.648432	2.22526e-30
darkorange2	FAM110D	FAM110D	0.648126	2.41787e-30
darkorange2	LOC439949	NA	0.648103	2.433e-30
darkorange2	POLE3	POLE3	0.647523	2.84619e-30
darkorange2	UBD	UBD	0.645728	4.61503e-30
darkorange2	LMCD1	LMCD1	0.64548	4.93289e-30
darkorange2	SNAPIN	SNAPIN	0.645371	5.07855e-30
darkorange2	LOC100505495	NA	0.643103	9.30551e-30
darkorange2	NLE1	NLE1	0.640832	1.69725e-29
darkorange2	MIF4GD	MIF4GD	0.64054	1.83307e-29
darkorange2	POLA2	POLA2	0.638389	3.22228e-29
darkorange2	C2orf81	C2orf81	0.638173	3.40961e-29
darkorange2	ASGR2	ASGR2	0.636425	5.37354e-29
darkorange2	TNFRSF17	TNFRSF17	0.634976	7.81644e-29
darkorange2	TACSTD2	TACSTD2	0.634261	9.39716e-29
darkorange2	TP53	TP53	0.633787	1.06145e-28
darkorange2	HNRNPD	HNRNPD	0.633595	1.11507e-28
darkorange2	XYLT2	XYLT2	0.63256	1.45358e-28
darkorange2	MIA	MIA	0.631824	1.7542e-28
darkorange2	PSAP	PSAP	0.631501	1.90437e-28
darkorange2	ZNF48	ZNF48	0.630622	2.38151e-28
darkorange2	C7orf26	C7orf26	0.628194	4.3992e-28
darkorange2	LOC100288432	NA	0.627875	4.76646e-28
darkorange2	CCDC106	CCDC106	0.627165	5.69725e-28
darkorange2	JSRP1	JSRP1	0.626748	6.32411e-28
darkorange2	NME4	NME4	0.62476	1.03838e-27
darkorange2	DCAKD	DCAKD	0.624002	1.25342e-27
darkorange2	TP53RK	TP53RK	0.623936	1.27393e-27
darkorange2	FSTL3	FSTL3	0.623625	1.37602e-27
darkorange2	POLR1C	POLR1C	0.621755	2.1827e-27
darkorange2	OLFML3	OLFML3	0.621066	2.58487e-27
darkorange2	S100B	S100B	0.620217	3.18238e-27
darkorange2	ZNF775	ZNF775	0.620151	3.23407e-27
darkorange2	LAIR2	LAIR2	0.619622	3.67974e-27
darkorange2	NFKBIA	NFKBIA	0.619393	3.8911e-27
darkorange2	POMC	POMC	0.61935	3.93263e-27
darkorange2	SNX8	SNX8	0.61817	5.23951e-27
darkorange2	RBFA	RBFA	0.617728	5.83213e-27
darkorange2	FXYD6	FXYD6	0.61767	5.915e-27
darkorange2	RNF216P1	RNF216P1	0.617621	5.98526e-27
darkorange2	SRP19	SRP19	0.615465	1.00704e-26
darkorange2	SMARCAL1	SMARCAL1	0.615243	1.06227e-26
darkorange2	AMZ2	AMZ2	0.615095	1.10053e-26
darkorange2	PANK2	PANK2	0.613077	1.78359e-26
darkorange2	LOC100505650	NA	0.611905	2.35662e-26
darkorange2	PHF23	PHF23	0.610197	3.53044e-26
darkorange2	IPO4	IPO4	0.609347	4.31263e-26
darkorange2	SNAP47	SNAP47	0.608435	5.34339e-26
darkorange2	CRABP2	CRABP2	0.608413	5.37073e-26
darkorange2	ZRSR2	ZRSR2	0.608203	5.64067e-26
darkorange2	GRN	GRN	0.60781	6.18546e-26
darkorange2	ASMTL	ASMTL	0.606928	7.59975e-26
darkorange2	HOMER3	HOMER3	0.604301	1.39814e-25
darkorange2	MXRA8	MXRA8	0.602988	1.89234e-25
darkorange2	ZNF691	ZNF691	0.602977	1.89713e-25
darkorange2	KIAA0020	NA	0.602166	2.28586e-25
darkorange2	COPZ2	COPZ2	0.601323	2.77207e-25
darkorange2	DDX10	DDX10	0.600508	3.33917e-25
darkorange2	LOC100128252	NA	0.600144	3.62777e-25
darkorange2	ETV5	ETV5	0.598498	5.27133e-25
darkorange2	LAMP5	LAMP5	0.596172	8.90616e-25
darkorange2	MTMR14	MTMR14	0.59607	9.11275e-25
darkorange2	CAMP	CAMP	0.595859	9.55339e-25
darkorange2	HOXC4	HOXC4	0.592158	2.1797e-24
darkorange2	FTSJ2	NA	0.591846	2.33539e-24
darkorange2	WTIP	WTIP	0.591658	2.43496e-24
darkorange2	CCNE1	CCNE1	0.590929	2.86005e-24
darkorange2	ST6GALNAC6	ST6GALNAC6	0.590553	3.10703e-24
darkorange2	HOXD9	HOXD9	0.589907	3.58142e-24
darkorange2	EFTUD2	EFTUD2	0.589561	3.86345e-24
darkorange2	EIF3D	EIF3D	0.588001	5.43575e-24
darkorange2	PACSIN3	PACSIN3	0.58673	7.17015e-24
darkorange2	EMILIN1	EMILIN1	0.586601	7.37307e-24
darkorange2	ARL2BP	ARL2BP	0.586425	7.66053e-24
darkorange2	RAB3IL1	RAB3IL1	0.584155	1.25156e-23
darkorange2	ARRB2	ARRB2	0.583997	1.29476e-23
darkorange2	LOC100506190	NA	0.583527	1.43259e-23
darkorange2	UBE2E1	UBE2E1	0.58347	1.45015e-23
darkorange2	LOC254128	NA	0.583262	1.51641e-23
darkorange2	TCEA2	TCEA2	0.582364	1.83847e-23
darkorange2	METTL23	METTL23	0.58179	2.07871e-23
darkorange2	SERPINA3	SERPINA3	0.581468	2.2265e-23
darkorange2	SRP68	SRP68	0.581104	2.40607e-23
darkorange2	NCALD	NCALD	0.580698	2.62345e-23
darkorange2	EDC3	EDC3	0.580542	2.71209e-23
darkorange2	GZMM	GZMM	0.577272	5.41639e-23
darkorange2	TRIM16L	TRIM16L	0.575736	7.47566e-23
darkorange2	AK1	AK1	0.574553	9.57122e-23
darkorange2	EIF2S3	EIF2S3	0.573827	1.11306e-22
darkorange2	SF1	SF1	0.573416	1.21236e-22
darkorange2	ATP13A2	ATP13A2	0.573063	1.30438e-22
darkorange2	GZMH	GZMH	0.571729	1.71921e-22
darkorange2	CSTF1	CSTF1	0.571599	1.76578e-22
darkorange2	CXCR3	CXCR3	0.568463	3.36048e-22
darkorange2	ADRB2	ADRB2	0.567461	4.12201e-22
darkorange2	LOC400043	NA	0.566994	4.53259e-22
darkorange2	BBIP1	BBIP1	0.566415	5.09793e-22
darkorange2	CD7	CD7	0.565939	5.61376e-22
darkorange2	SSRP1	SSRP1	0.565229	6.47997e-22
darkorange2	ARL8A	ARL8A	0.564991	6.79859e-22
darkorange2	FBXO2	FBXO2	0.55973	1.94653e-21
darkorange2	LINC00339	LINC00339	0.558823	2.32918e-21
darkorange2	TIPIN	TIPIN	0.556662	3.56459e-21
darkorange2	CTSW	CTSW	0.551443	9.83287e-21
darkorange2	POLR3F	POLR3F	0.548616	1.69127e-20
darkorange2	HLA-DQA1	HLA-DQA1	0.547775	1.9852e-20
darkorange2	MNAT1	MNAT1	0.546688	2.44096e-20
darkorange2	NDUFA4L2	NDUFA4L2	0.545839	2.86673e-20
darkorange2	HLA-DPB2	HLA-DPB2	0.544528	3.67168e-20
darkorange2	C16orf89	C16orf89	0.541712	6.22452e-20
darkorange2	SET	SET	0.541401	6.59625e-20
darkorange2	TCTN2	TCTN2	0.540421	7.91524e-20
darkorange2	HEY1	HEY1	0.538165	1.20166e-19
darkorange2	USP39	USP39	0.537077	1.46813e-19
darkorange2	HAMP	HAMP	0.536094	1.7583e-19
darkorange2	MED6	MED6	0.535273	2.04304e-19
darkorange2	MAP1S	MAP1S	0.532991	3.09436e-19
darkorange2	FABP3	FABP3	0.528797	6.58255e-19
darkorange2	CXorf69	NA	0.527342	8.53337e-19
darkorange2	LOC283070	NA	0.524811	1.33607e-18
darkorange2	SNURF	SNURF	0.522272	2.08696e-18
darkorange2	HOXC9	HOXC9	0.521404	2.42886e-18
darkorange2	CST1	CST1	0.519407	3.43711e-18
darkorange2	HNRNPC	HNRNPC	0.518012	4.37422e-18
darkorange2	RWDD2B	RWDD2B	0.516652	5.5282e-18
darkorange2	USF2	USF2	0.514927	7.42812e-18
darkorange2	EXOSC3	EXOSC3	0.514677	7.75209e-18
darkorange2	ACYP2	ACYP2	0.514315	8.24604e-18
darkorange2	TCEAL7	TCEAL7	0.514247	8.34177e-18
darkorange2	CPLX1	CPLX1	0.513182	9.9984e-18
darkorange2	PLD4	PLD4	0.512206	1.1797e-17
darkorange2	NAA38	NAA38	0.51201	1.21935e-17
darkorange2	HAUS8	HAUS8	0.511617	1.30317e-17
darkorange2	FAM50B	FAM50B	0.51138	1.35645e-17
darkorange2	CNPY4	CNPY4	0.510392	1.60212e-17
darkorange2	TMEM200B	TMEM200B	0.51037	1.60797e-17
darkorange2	MRPS6	MRPS6	0.509116	1.98482e-17
darkorange2	DSTNP2	DSTNP2	0.505896	3.39438e-17
darkorange2	LOC100505971	NA	0.504908	3.99747e-17
darkorange2	SMU1	SMU1	0.504783	4.08088e-17
darkorange2	CHAF1A	CHAF1A	0.504169	4.51618e-17
darkorange2	RASAL1	RASAL1	0.501001	7.5925e-17
darkorange2	ILK	ILK	0.500907	7.71017e-17
darkorange2	ELAC2	ELAC2	0.499792	9.2435e-17
darkorange2	SCARB1	SCARB1	0.497063	1.43741e-16
darkorange2	LOC100049716	NA	0.496063	1.68824e-16
darkorange2	LOC282997	NA	0.494767	2.07778e-16
darkorange2	NOB1	NOB1	0.491318	3.59488e-16
darkorange2	COPS8	COPS8	0.488634	5.48454e-16
darkorange2	SERPINF2	SERPINF2	0.487698	6.34862e-16
darkorange2	HSP90AB1	HSP90AB1	0.478097	2.77902e-15
darkorange2	TSC22D3	TSC22D3	0.476314	3.63746e-15
darkorange2	SYS1	SYS1	0.475323	4.22124e-15
darkorange2	SF3B2	SF3B2	0.471589	7.36649e-15
darkorange2	PRSS21	PRSS21	0.462282	2.86613e-14
darkorange2	YTHDF1	YTHDF1	0.452819	1.09441e-13
darkorange2	PRR11	PRR11	0.445946	2.82259e-13
darkorange2	RPL13P5	RPL13P5	0.443917	3.71843e-13
darkorange2	HOXC8	HOXC8	0.443627	3.86728e-13
darkorange2	KHDRBS1	KHDRBS1	0.439715	6.54298e-13
darkorange2	SFR1	SFR1	0.434841	1.24792e-12
darkorange2	C22orf39	C22orf39	0.431838	1.84849e-12
darkorange2	FRAT1	FRAT1	0.430185	2.29085e-12
darkorange2	GPAT2	GPAT2	0.429121	2.62851e-12
darkorange2	CBX8	CBX8	0.427346	3.30226e-12
darkorange2	DBNDD1	DBNDD1	0.425016	4.44771e-12
darkorange2	POLR3C	POLR3C	0.424476	4.76351e-12
darkorange2	NUBP1	NUBP1	0.420956	7.43003e-12
darkorange2	SEH1L	SEH1L	0.420222	8.14728e-12
darkorange2	RG9MTD1	NA	0.418976	9.5201e-12
darkorange2	LOC100287814	NA	0.413961	1.77059e-11
darkorange2	F2RL3	F2RL3	0.407266	3.99007e-11
darkorange2	AP1B1	AP1B1	0.403798	6.0355e-11
darkorange2	BEX2	BEX2	0.395988	1.50631e-10
darkorange2	PELI3	PELI3	0.392706	2.19663e-10
darkorange2	HLA-DMB	HLA-DMB	0.387525	3.95152e-10
darkorange2	DENND2A	DENND2A	0.377734	1.16604e-09
darkorange2	TUBA4B	TUBA4B	0.377456	1.20175e-09
darkorange2	C17orf61-PLSCR3	NA	0.37664	1.3129e-09
darkorange2	UCHL1	UCHL1	0.371063	2.3882e-09
darkorange2	ABT1	ABT1	0.369821	2.7243e-09
darkorange2	PPPDE2	NA	0.366607	3.82061e-09
darkorange2	MSLN	MSLN	0.355081	1.24664e-08
darkorange2	WFS1	WFS1	0.354088	1.37734e-08
darkorange2	PIM1	PIM1	0.353306	1.48946e-08
darkorange2	NPB	NPB	0.342681	4.22489e-08
darkorange2	FOPNL	FOPNL	0.33828	6.43399e-08
darkorange2	NFYC	NFYC	0.331513	1.21307e-07
darkorange2	CCL20	CCL20	0.326877	1.85668e-07
darkorange2	PDE6D	PDE6D	0.324884	2.22473e-07
darkorange2	TRAP1	TRAP1	0.321877	2.91539e-07
darkorange2	TEX30	TEX30	0.319451	3.61819e-07
darkorange2	MX1	MX1	0.316065	4.87623e-07
darkorange2	BAMBI	BAMBI	0.311517	7.2377e-07
darkorange2	TPSD1	TPSD1	0.296932	2.45852e-06
darkorange2	E2F2	E2F2	0.296894	2.46619e-06
darkorange2	PSPH	PSPH	0.288702	4.76201e-06
darkorange2	TRIM47	TRIM47	0.286	5.88992e-06
darkorange2	C6orf62	C6orf62	0.282992	7.44352e-06
darkorange2	MSL3P1	MSL3P1	0.263968	3.07565e-05
darkorange2	TTC4	TTC4	0.25011	8.09558e-05
darkorange2	GIPC3	GIPC3	0.24947	8.45463e-05
darkorange2	ZNF232	ZNF232	0.244754	0.000115987
darkorange2	COPG2	COPG2	0.242394	0.000135559
darkorange2	METTL16	METTL16	0.239335	0.000165539
darkorange2	FBLN5	FBLN5	0.227277	0.000354957
darkorange2	TMEM66	NA	0.214084	0.000782075
darkorange2	CLEC9A	CLEC9A	0.212203	0.000872047
darkorange2	C2orf40	C2orf40	0.212108	0.000876838
darkorange2	DCP1B	DCP1B	0.203349	0.00143798
darkorange2	RTN4R	RTN4R	0.159757	0.0126471
darkorange2	DEDD	DEDD	0.129084	0.0444039
darkorange2	PSPHP1	PSPHP1	0.0933031	0.147026
lightsteelblue1	ZDHHC3	ZDHHC3	0.931359	9.90554e-108
lightsteelblue1	CDH17	CDH17	0.929919	1.10683e-106
lightsteelblue1	KIAA1522	KIAA1522	0.929401	2.60581e-106
lightsteelblue1	MYO1D	MYO1D	0.927546	5.28909e-105
lightsteelblue1	C4orf19	C4orf19	0.923774	1.9005e-102
lightsteelblue1	CAPN5	CAPN5	0.922869	7.45048e-102
lightsteelblue1	IRF6	IRF6	0.921778	3.78277e-101
lightsteelblue1	OVOL1	OVOL1	0.921383	6.77575e-101
lightsteelblue1	GPA33	GPA33	0.921238	8.3868e-101
lightsteelblue1	F2RL1	F2RL1	0.919303	1.38654e-99
lightsteelblue1	SORT1	SORT1	0.91693	3.93234e-98
lightsteelblue1	FZD5	FZD5	0.915032	5.32354e-97
lightsteelblue1	WASL	WASL	0.914839	6.91425e-97
lightsteelblue1	MYO5B	MYO5B	0.913659	3.3723e-96
lightsteelblue1	TMEM45B	TMEM45B	0.913655	3.39177e-96
lightsteelblue1	CCDC85C	CCDC85C	0.911133	9.31477e-95
lightsteelblue1	CEBPG	CEBPG	0.906743	2.36872e-92
lightsteelblue1	CDS1	CDS1	0.906492	3.22367e-92
lightsteelblue1	PAFAH2	PAFAH2	0.90616	4.83965e-92
lightsteelblue1	LRRC19	LRRC19	0.905419	1.19183e-91
lightsteelblue1	NET1	NET1	0.899431	1.34081e-88
lightsteelblue1	MAP7	MAP7	0.899108	1.93187e-88
lightsteelblue1	CDH1	CDH1	0.898938	2.34195e-88
lightsteelblue1	MARVELD3	MARVELD3	0.898779	2.80305e-88
lightsteelblue1	XK	XK	0.897722	9.18126e-88
lightsteelblue1	TMEM30B	TMEM30B	0.897095	1.84376e-87
lightsteelblue1	FAM110C	FAM110C	0.895308	1.31221e-86
lightsteelblue1	C1orf106	NA	0.893991	5.45168e-86
lightsteelblue1	PAPSS2	PAPSS2	0.890758	1.66244e-84
lightsteelblue1	TJP3	TJP3	0.890094	3.30938e-84
lightsteelblue1	CRB3	CRB3	0.889786	4.5488e-84
lightsteelblue1	ST14	ST14	0.889029	9.89647e-84
lightsteelblue1	DOK4	DOK4	0.888862	1.1747e-83
lightsteelblue1	IGF2BP2	IGF2BP2	0.888432	1.81955e-83
lightsteelblue1	BCL2L15	BCL2L15	0.887937	3.00737e-83
lightsteelblue1	NDFIP2	NDFIP2	0.887819	3.39013e-83
lightsteelblue1	GRAMD3	NA	0.887146	6.67932e-83
lightsteelblue1	B4GALT4	B4GALT4	0.886072	1.95585e-82
lightsteelblue1	NUDT16P1	NUDT16P1	0.885079	5.22721e-82
lightsteelblue1	MAPK13	MAPK13	0.884107	1.357e-81
lightsteelblue1	ADTRP	ADTRP	0.883197	3.28942e-81
lightsteelblue1	SLC35D2	SLC35D2	0.882473	6.61891e-81
lightsteelblue1	ABCD3	ABCD3	0.882412	7.01479e-81
lightsteelblue1	TACC2	TACC2	0.88219	8.68413e-81
lightsteelblue1	SH3D19	SH3D19	0.881998	1.04387e-80
lightsteelblue1	RAVER2	RAVER2	0.881	2.70672e-80
lightsteelblue1	AKAP1	AKAP1	0.880315	5.17533e-80
lightsteelblue1	ESRRA	ESRRA	0.878916	1.92207e-79
lightsteelblue1	NR3C2	NR3C2	0.877682	6.03373e-79
lightsteelblue1	UAP1	UAP1	0.877589	6.57475e-79
lightsteelblue1	CLDN23	CLDN23	0.876014	2.7791e-78
lightsteelblue1	SH3BGRL2	SH3BGRL2	0.872678	5.5152e-77
lightsteelblue1	CASP6	CASP6	0.872604	5.88863e-77
lightsteelblue1	VDR	VDR	0.871422	1.6627e-76
lightsteelblue1	CLCN2	CLCN2	0.871208	2.00483e-76
lightsteelblue1	RBM47	RBM47	0.87106	2.28204e-76
lightsteelblue1	GPD1L	GPD1L	0.870528	3.62243e-76
lightsteelblue1	EPCAM	EPCAM	0.870019	5.6285e-76
lightsteelblue1	PCDH1	PCDH1	0.869112	1.22866e-75
lightsteelblue1	TSPAN3	TSPAN3	0.868303	2.45282e-75
lightsteelblue1	SH3RF2	SH3RF2	0.866664	9.8074e-75
lightsteelblue1	HEPH	HEPH	0.86575	2.10788e-74
lightsteelblue1	APPL2	APPL2	0.865191	3.35746e-74
lightsteelblue1	CMAS	CMAS	0.863	2.03798e-73
lightsteelblue1	HHLA2	HHLA2	0.861038	9.98094e-73
lightsteelblue1	PTPRH	PTPRH	0.860383	1.68816e-72
lightsteelblue1	PRR15L	PRR15L	0.859033	4.93688e-72
lightsteelblue1	GNG12	GNG12	0.858853	5.69346e-72
lightsteelblue1	LOC100130899	NA	0.858383	8.2461e-72
lightsteelblue1	RIOK3	RIOK3	0.858375	8.3033e-72
lightsteelblue1	STYK1	STYK1	0.857729	1.37851e-71
lightsteelblue1	H1F0	H1F0	0.856457	3.7146e-71
lightsteelblue1	ITGA3	ITGA3	0.854549	1.61476e-70
lightsteelblue1	PLS1	PLS1	0.854482	1.70016e-70
lightsteelblue1	PERP	PERP	0.854089	2.29374e-70
lightsteelblue1	FAM59A	NA	0.852787	6.15874e-70
lightsteelblue1	TUFT1	TUFT1	0.851382	1.76822e-69
lightsteelblue1	PEX26	PEX26	0.84781	2.46232e-68
lightsteelblue1	KLF5	KLF5	0.846899	4.76682e-68
lightsteelblue1	SLC44A4	SLC44A4	0.84586	1.0076e-67
lightsteelblue1	LOC100289255	NA	0.84574	1.09828e-67
lightsteelblue1	LOC100499467	NA	0.845301	1.50341e-67
lightsteelblue1	PTPN3	PTPN3	0.843901	4.07033e-67
lightsteelblue1	SCP2	SCP2	0.842605	1.01421e-66
lightsteelblue1	ARHGEF5	ARHGEF5	0.840742	3.71388e-66
lightsteelblue1	SDHA	SDHA	0.838522	1.70739e-65
lightsteelblue1	PRELID2	PRELID2	0.838149	2.20142e-65
lightsteelblue1	C6orf132	C6orf132	0.837536	3.33822e-65
lightsteelblue1	KLF4	KLF4	0.836837	5.35046e-65
lightsteelblue1	LGALSL	LGALSL	0.834879	1.98577e-64
lightsteelblue1	HNF1B	HNF1B	0.834799	2.09457e-64
lightsteelblue1	FRK	FRK	0.833939	3.70372e-64
lightsteelblue1	MLX	MLX	0.833884	3.84174e-64
lightsteelblue1	SUCLG2	SUCLG2	0.833633	4.5342e-64
lightsteelblue1	ALDH3A2	ALDH3A2	0.833294	5.6684e-64
lightsteelblue1	SEMA6A	SEMA6A	0.831609	1.70789e-63
lightsteelblue1	FUT6	FUT6	0.830665	3.15158e-63
lightsteelblue1	PPARGC1A	PPARGC1A	0.830502	3.50185e-63
lightsteelblue1	TCF7L2	TCF7L2	0.829732	5.75241e-63
lightsteelblue1	SLC17A5	SLC17A5	0.82959	6.30399e-63
lightsteelblue1	CGN	CGN	0.829532	6.54451e-63
lightsteelblue1	C1orf116	C1orf116	0.829005	9.17561e-63
lightsteelblue1	LRRFIP2	LRRFIP2	0.828526	1.24593e-62
lightsteelblue1	EXT1	EXT1	0.826531	4.41326e-62
lightsteelblue1	KRT20	KRT20	0.826349	4.94868e-62
lightsteelblue1	CDX2	CDX2	0.82593	6.43939e-62
lightsteelblue1	SEMA4G	SEMA4G	0.824073	2.05017e-61
lightsteelblue1	MAP3K13	MAP3K13	0.823646	2.67148e-61
lightsteelblue1	HOOK1	HOOK1	0.823506	2.9116e-61
lightsteelblue1	ACSS2	ACSS2	0.822649	4.93799e-61
lightsteelblue1	LNX2	LNX2	0.82241	5.71863e-61
lightsteelblue1	SLC22A23	SLC22A23	0.821048	1.31429e-60
lightsteelblue1	DTX4	DTX4	0.820954	1.39161e-60
lightsteelblue1	CD164	CD164	0.820518	1.81337e-60
lightsteelblue1	F11R	F11R	0.818947	4.6793e-60
lightsteelblue1	TMEM164	TMEM164	0.818059	7.96398e-60
lightsteelblue1	FBLIM1	FBLIM1	0.81656	1.94229e-59
lightsteelblue1	DDR1	DDR1	0.816128	2.507e-59
lightsteelblue1	GPRC5C	GPRC5C	0.815447	3.74271e-59
lightsteelblue1	KALRN	KALRN	0.815418	3.80725e-59
lightsteelblue1	AGAP1	AGAP1	0.815394	3.86256e-59
lightsteelblue1	LMO7	LMO7	0.81466	5.9407e-59
lightsteelblue1	SGK2	SGK2	0.814318	7.25354e-59
lightsteelblue1	PLXNA2	PLXNA2	0.81394	9.04232e-59
lightsteelblue1	CD2AP	CD2AP	0.813473	1.18626e-58
lightsteelblue1	FAM83F	FAM83F	0.813061	1.50681e-58
lightsteelblue1	SPINT2	SPINT2	0.81299	1.57017e-58
lightsteelblue1	MAST2	MAST2	0.812893	1.66066e-58
lightsteelblue1	DSP	DSP	0.812339	2.28627e-58
lightsteelblue1	IDH1	IDH1	0.811967	2.83396e-58
lightsteelblue1	PSEN1	PSEN1	0.811749	3.21141e-58
lightsteelblue1	OCLN	OCLN	0.80958	1.10832e-57
lightsteelblue1	AUH	AUH	0.808931	1.60068e-57
lightsteelblue1	PARD3	PARD3	0.808757	1.76682e-57
lightsteelblue1	C1orf172	NA	0.807276	4.06103e-57
lightsteelblue1	PTK6	PTK6	0.806896	5.02343e-57
lightsteelblue1	BARX2	BARX2	0.806436	6.49455e-57
lightsteelblue1	C10orf108	NA	0.806363	6.76305e-57
lightsteelblue1	C5orf30	C5orf30	0.806244	7.22605e-57
lightsteelblue1	HEPACAM2	HEPACAM2	0.805663	9.97679e-57
lightsteelblue1	CHP	NA	0.805385	1.16398e-56
lightsteelblue1	PPP2CB	PPP2CB	0.805247	1.25599e-56
lightsteelblue1	DUSP8	DUSP8	0.80507	1.38563e-56
lightsteelblue1	SPATA2	SPATA2	0.804402	2.0026e-56
lightsteelblue1	NR5A2	NR5A2	0.804177	2.26607e-56
lightsteelblue1	TPM1	TPM1	0.803227	3.81552e-56
lightsteelblue1	ETFDH	ETFDH	0.803073	4.15162e-56
lightsteelblue1	KIAA1804	NA	0.802773	4.89064e-56
lightsteelblue1	SDCBP2	SDCBP2	0.801474	9.90368e-56
lightsteelblue1	PP7080	PP7080	0.800859	1.3806e-55
lightsteelblue1	PLA2G4F	PLA2G4F	0.800759	1.45735e-55
lightsteelblue1	CASZ1	CASZ1	0.800177	1.99376e-55
lightsteelblue1	VAPB	VAPB	0.799535	2.81319e-55
lightsteelblue1	PINK1	PINK1	0.798587	4.66695e-55
lightsteelblue1	HPGD	HPGD	0.797695	7.49276e-55
lightsteelblue1	LRP5	LRP5	0.79757	8.00532e-55
lightsteelblue1	LRRC16A	NA	0.797117	1.01721e-54
lightsteelblue1	PAK4	PAK4	0.797035	1.06263e-54
lightsteelblue1	MGLL	MGLL	0.796645	1.30528e-54
lightsteelblue1	C1orf201	NA	0.796538	1.38059e-54
lightsteelblue1	MYH14	MYH14	0.796326	1.5433e-54
lightsteelblue1	LRRC1	LRRC1	0.796308	1.55839e-54
lightsteelblue1	GOLPH3L	GOLPH3L	0.796032	1.80091e-54
lightsteelblue1	CAMSAP3	CAMSAP3	0.795201	2.78326e-54
lightsteelblue1	SESN2	SESN2	0.794476	4.06174e-54
lightsteelblue1	CHMP2B	CHMP2B	0.794046	5.0799e-54
lightsteelblue1	SLC26A3	SLC26A3	0.793373	7.20077e-54
lightsteelblue1	UBTD2	UBTD2	0.791291	2.10001e-53
lightsteelblue1	TRIM36	TRIM36	0.790949	2.50122e-53
lightsteelblue1	RAB11FIP1	RAB11FIP1	0.789724	4.66388e-53
lightsteelblue1	CLCA1	CLCA1	0.788822	7.3619e-53
lightsteelblue1	IL13RA1	IL13RA1	0.788404	9.0869e-53
lightsteelblue1	CCDC68	CCDC68	0.787678	1.30866e-52
lightsteelblue1	KIF1C	KIF1C	0.787678	1.30868e-52
lightsteelblue1	CDX1	CDX1	0.786976	1.85959e-52
lightsteelblue1	SYAP1	SYAP1	0.786332	2.56356e-52
lightsteelblue1	ATP9A	ATP9A	0.785982	3.0508e-52
lightsteelblue1	HTATIP2	HTATIP2	0.7844	6.67438e-52
lightsteelblue1	CHMP3	CHMP3	0.784242	7.21394e-52
lightsteelblue1	DSC2	DSC2	0.783707	9.38022e-52
lightsteelblue1	MMP15	MMP15	0.783337	1.12513e-51
lightsteelblue1	ATG5	ATG5	0.783256	1.1705e-51
lightsteelblue1	SBDS	SBDS	0.781932	2.23266e-51
lightsteelblue1	COQ9	COQ9	0.781829	2.34746e-51
lightsteelblue1	CTH	CTH	0.781102	3.33991e-51
lightsteelblue1	LARGE	NA	0.780919	3.64991e-51
lightsteelblue1	OTUD7B	OTUD7B	0.780724	4.01015e-51
lightsteelblue1	ATP1B1	ATP1B1	0.778556	1.13614e-50
lightsteelblue1	TMC4	TMC4	0.77819	1.35304e-50
lightsteelblue1	ETFA	ETFA	0.777226	2.1406e-50
lightsteelblue1	SCAMP2	SCAMP2	0.77718	2.18706e-50
lightsteelblue1	MYO7B	MYO7B	0.776961	2.42707e-50
lightsteelblue1	GPBP1L1	GPBP1L1	0.774968	6.20734e-50
lightsteelblue1	STAMBP	STAMBP	0.774967	6.21084e-50
lightsteelblue1	FHDC1	FHDC1	0.77491	6.3796e-50
lightsteelblue1	ITGB4	ITGB4	0.774769	6.81431e-50
lightsteelblue1	NEURL1B	NEURL1B	0.774718	6.97741e-50
lightsteelblue1	SLITRK6	SLITRK6	0.7741	9.31825e-50
lightsteelblue1	FAM177A1	FAM177A1	0.773175	1.43296e-49
lightsteelblue1	C15orf38	C15orf38-AP3S2	0.772706	1.78187e-49
lightsteelblue1	C11orf54	C11orf54	0.771179	3.60567e-49
lightsteelblue1	TMEM106C	TMEM106C	0.770501	4.92266e-49
lightsteelblue1	HOXA10	HOXA10	0.769911	6.44938e-49
lightsteelblue1	EPPK1	EPPK1	0.7694	8.14197e-49
lightsteelblue1	EIF4E3	EIF4E3	0.769026	9.6505e-49
lightsteelblue1	C20orf112	NA	0.767616	1.82902e-48
lightsteelblue1	DDAH1	DDAH1	0.767436	1.98335e-48
lightsteelblue1	MTFR1	MTFR1	0.766398	3.16572e-48
lightsteelblue1	PTPRD	PTPRD	0.764916	6.14056e-48
lightsteelblue1	CARD10	CARD10	0.764594	7.08799e-48
lightsteelblue1	MKRN1	MKRN1	0.763904	9.62848e-48
lightsteelblue1	AMOT	AMOT	0.763897	9.65727e-48
lightsteelblue1	SCUBE1	SCUBE1	0.763873	9.76035e-48
lightsteelblue1	BCAR1	BCAR1	0.762766	1.59237e-47
lightsteelblue1	RXRA	RXRA	0.762354	1.90958e-47
lightsteelblue1	TOB1	TOB1	0.762195	2.04764e-47
lightsteelblue1	TMEM56	TMEM56	0.762115	2.1212e-47
lightsteelblue1	SYT7	SYT7	0.7606	4.11672e-47
lightsteelblue1	SOSTDC1	SOSTDC1	0.759126	7.81194e-47
lightsteelblue1	MGAT4A	MGAT4A	0.758071	1.23215e-46
lightsteelblue1	TSKU	TSKU	0.757441	1.61595e-46
lightsteelblue1	TMEM144	TMEM144	0.757395	1.64846e-46
lightsteelblue1	HSD11B2	HSD11B2	0.756821	2.10815e-46
lightsteelblue1	MEST	MEST	0.756446	2.47501e-46
lightsteelblue1	LOC100505989	NA	0.756016	2.97413e-46
lightsteelblue1	MAL2	MAL2	0.755983	3.01603e-46
lightsteelblue1	GHITM	GHITM	0.755802	3.25856e-46
lightsteelblue1	IHH	IHH	0.754475	5.7258e-46
lightsteelblue1	LGALS3	LGALS3	0.754059	6.8255e-46
lightsteelblue1	CALML4	CALML4	0.753769	7.7144e-46
lightsteelblue1	IDH3A	IDH3A	0.753527	8.54479e-46
lightsteelblue1	KIF3B	KIF3B	0.752821	1.14983e-45
lightsteelblue1	TLCD2	TLCD2	0.751994	1.62657e-45
lightsteelblue1	PKIB	PKIB	0.751236	2.23204e-45
lightsteelblue1	CLDN7	CLDN7	0.751009	2.45391e-45
lightsteelblue1	TMBIM1	TMBIM1	0.750785	2.69364e-45
lightsteelblue1	HR	HR	0.749776	4.09389e-45
lightsteelblue1	P2RY2	P2RY2	0.749733	4.16795e-45
lightsteelblue1	PEX11A	PEX11A	0.74958	4.44121e-45
lightsteelblue1	CPT2	CPT2	0.748909	5.8586e-45
lightsteelblue1	FLNB	FLNB	0.748688	6.41686e-45
lightsteelblue1	DLG3	DLG3	0.748679	6.44134e-45
lightsteelblue1	GOT1	GOT1	0.748367	7.32357e-45
lightsteelblue1	SLC35F2	SLC35F2	0.745109	2.76809e-44
lightsteelblue1	AMACR	AMACR	0.744881	3.0359e-44
lightsteelblue1	TRIM10	TRIM10	0.744799	3.13831e-44
lightsteelblue1	SERINC2	SERINC2	0.744615	3.37997e-44
lightsteelblue1	UQCRC2	UQCRC2	0.743898	4.51412e-44
lightsteelblue1	SATB2	SATB2	0.743561	5.16925e-44
lightsteelblue1	CMPK1	CMPK1	0.743369	5.58469e-44
lightsteelblue1	SLMO2	NA	0.743028	6.40367e-44
lightsteelblue1	TMEM63B	TMEM63B	0.742502	7.90761e-44
lightsteelblue1	PRSS16	PRSS16	0.742073	9.38565e-44
lightsteelblue1	GJB1	GJB1	0.741619	1.12495e-43
lightsteelblue1	TRPM4	TRPM4	0.741464	1.19631e-43
lightsteelblue1	C2orf47	NA	0.740225	1.95661e-43
lightsteelblue1	MXI1	MXI1	0.739697	2.41181e-43
lightsteelblue1	XDH	XDH	0.73887	3.34081e-43
lightsteelblue1	TNK1	TNK1	0.736961	7.05686e-43
lightsteelblue1	LOC100653011	NA	0.73673	7.72178e-43
lightsteelblue1	TPD52	TPD52	0.736019	1.01823e-42
lightsteelblue1	TMEM9B	TMEM9B	0.735804	1.10713e-42
lightsteelblue1	CES3	CES3	0.73565	1.175e-42
lightsteelblue1	RUSC1	RUSC1	0.734869	1.59002e-42
lightsteelblue1	ACAA2	ACAA2	0.734364	1.93236e-42
lightsteelblue1	SDR42E1	SDR42E1	0.734089	2.14814e-42
lightsteelblue1	FAM83E	FAM83E	0.733294	2.91557e-42
lightsteelblue1	RFK	RFK	0.733041	3.21228e-42
lightsteelblue1	SRI	SRI	0.732872	3.42729e-42
lightsteelblue1	SDHB	SDHB	0.732735	3.6122e-42
lightsteelblue1	PGM1	PGM1	0.732516	3.92802e-42
lightsteelblue1	HCCS	HCCS	0.732029	4.73052e-42
lightsteelblue1	PROM1	PROM1	0.731846	5.0714e-42
lightsteelblue1	CYB561	CYB561	0.731533	5.71492e-42
lightsteelblue1	FAM46A	NA	0.72873	1.64992e-41
lightsteelblue1	PAQR8	PAQR8	0.728692	1.67305e-41
lightsteelblue1	USP43	USP43	0.727699	2.42832e-41
lightsteelblue1	ATP1B3	ATP1B3	0.727571	2.54756e-41
lightsteelblue1	FAM5C	NA	0.726695	3.5325e-41
lightsteelblue1	DEPTOR	DEPTOR	0.72616	4.30983e-41
lightsteelblue1	PPARG	PPARG	0.725328	5.86749e-41
lightsteelblue1	CA7	CA7	0.72484	7.0297e-41
lightsteelblue1	SLC26A2	SLC26A2	0.724598	7.68495e-41
lightsteelblue1	WSB2	WSB2	0.724008	9.55321e-41
lightsteelblue1	SIAE	SIAE	0.722803	1.48664e-40
lightsteelblue1	STK24	STK24	0.722483	1.67168e-40
lightsteelblue1	TMEM135	TMEM135	0.722434	1.70162e-40
lightsteelblue1	PPP1R13B	PPP1R13B	0.721803	2.14215e-40
lightsteelblue1	REP15	REP15	0.721197	2.6713e-40
lightsteelblue1	IL17RE	IL17RE	0.720832	3.05042e-40
lightsteelblue1	NAPEPLD	NAPEPLD	0.720457	3.49454e-40
lightsteelblue1	BEST4	BEST4	0.720452	3.50117e-40
lightsteelblue1	SLC25A4	SLC25A4	0.720294	3.70628e-40
lightsteelblue1	GDE1	GDE1	0.718545	6.9669e-40
lightsteelblue1	WNK2	WNK2	0.71797	8.5638e-40
lightsteelblue1	KIAA0284	NA	0.717348	1.06993e-39
lightsteelblue1	VTA1	VTA1	0.717238	1.11303e-39
lightsteelblue1	B3GNT7	B3GNT7	0.717168	1.14108e-39
lightsteelblue1	OSBPL2	OSBPL2	0.715636	1.96874e-39
lightsteelblue1	TSPAN8	TSPAN8	0.715482	2.07932e-39
lightsteelblue1	MRPL35	MRPL35	0.715192	2.30476e-39
lightsteelblue1	ZNF823	ZNF823	0.714781	2.66541e-39
lightsteelblue1	CLDN4	CLDN4	0.71425	3.21517e-39
lightsteelblue1	HAPLN1	HAPLN1	0.714174	3.30229e-39
lightsteelblue1	PTPRR	PTPRR	0.713642	3.98378e-39
lightsteelblue1	PRR5L	PRR5L	0.712559	5.82672e-39
lightsteelblue1	RNF152	RNF152	0.711122	9.62189e-39
lightsteelblue1	SMAP1	SMAP1	0.707	3.98939e-38
lightsteelblue1	HHIP	HHIP	0.706445	4.82299e-38
lightsteelblue1	AGR3	AGR3	0.706371	4.94724e-38
lightsteelblue1	ABCC6P2	ABCC6P2	0.705545	6.5539e-38
lightsteelblue1	MYO1C	MYO1C	0.705478	6.70367e-38
lightsteelblue1	SYTL5	SYTL5	0.705463	6.73927e-38
lightsteelblue1	PITX2	PITX2	0.705149	7.49818e-38
lightsteelblue1	HSDL2	HSDL2	0.704438	9.53959e-38
lightsteelblue1	FAM84A	FAM84A	0.703923	1.13542e-37
lightsteelblue1	FAM83H	FAM83H	0.703133	1.4819e-37
lightsteelblue1	SPRYD7	SPRYD7	0.702985	1.5575e-37
lightsteelblue1	OVOL2	OVOL2	0.702741	1.6908e-37
lightsteelblue1	DNAJC25	DNAJC25	0.701916	2.22927e-37
lightsteelblue1	COX10	COX10	0.701455	2.60128e-37
lightsteelblue1	HIGD1A	HIGD1A	0.700144	4.02736e-37
lightsteelblue1	MUC13	MUC13	0.699305	5.31977e-37
lightsteelblue1	SPIRE2	SPIRE2	0.698291	7.438e-37
lightsteelblue1	CC2D1A	CC2D1A	0.697694	9.05371e-37
lightsteelblue1	P4HA2	P4HA2	0.695555	1.82465e-36
lightsteelblue1	FAM150B	NA	0.694964	2.21218e-36
lightsteelblue1	TMC5	TMC5	0.694638	2.45955e-36
lightsteelblue1	LRRC66	LRRC66	0.694495	2.57659e-36
lightsteelblue1	FDX1	FDX1	0.692012	5.74657e-36
lightsteelblue1	BMP2	BMP2	0.688104	1.99843e-35
lightsteelblue1	ZNF552	ZNF552	0.686782	3.03277e-35
lightsteelblue1	B4GALNT2	B4GALNT2	0.686647	3.16391e-35
lightsteelblue1	NPTN	NPTN	0.686079	3.7823e-35
lightsteelblue1	MB	MB	0.684371	6.4533e-35
lightsteelblue1	B3GNT3	B3GNT3	0.683421	8.67267e-35
lightsteelblue1	AIFM1	AIFM1	0.683091	9.60738e-35
lightsteelblue1	TFG	TFG	0.68298	9.94168e-35
lightsteelblue1	WNK4	WNK4	0.682683	1.08994e-34
lightsteelblue1	C17orf63	NA	0.68221	1.26195e-34
lightsteelblue1	COL17A1	COL17A1	0.680982	1.84233e-34
lightsteelblue1	FAM63A	NA	0.677799	4.87271e-34
lightsteelblue1	STXBP6	STXBP6	0.676491	7.241e-34
lightsteelblue1	SLC35B3	SLC35B3	0.675685	9.2341e-34
lightsteelblue1	VWA5A	VWA5A	0.675625	9.40262e-34
lightsteelblue1	RAP1GAP	RAP1GAP	0.674335	1.38476e-33
lightsteelblue1	ENPP1	ENPP1	0.670956	3.78506e-33
lightsteelblue1	SLC44A3	SLC44A3	0.669256	6.24382e-33
lightsteelblue1	KIAA1609	NA	0.667912	9.25537e-33
lightsteelblue1	LLGL2	LLGL2	0.667687	9.88406e-33
lightsteelblue1	ACTN4	ACTN4	0.667438	1.06283e-32
lightsteelblue1	RNPEP	RNPEP	0.667004	1.20626e-32
lightsteelblue1	VDAC1	VDAC1	0.666168	1.53779e-32
lightsteelblue1	CPT1A	CPT1A	0.666012	1.60889e-32
lightsteelblue1	TMEM139	TMEM139	0.66514	2.07078e-32
lightsteelblue1	PDLIM1	PDLIM1	0.664707	2.34691e-32
lightsteelblue1	MAPKAPK5	MAPKAPK5	0.663966	2.90503e-32
lightsteelblue1	C2orf72	C2orf72	0.663804	3.04381e-32
lightsteelblue1	RAB6C	RAB6C	0.661879	5.2821e-32
lightsteelblue1	FGFR2	FGFR2	0.661451	5.96923e-32
lightsteelblue1	CDKN1A	CDKN1A	0.660195	8.52815e-32
lightsteelblue1	SMPDL3B	SMPDL3B	0.659642	9.97495e-32
lightsteelblue1	TMEM8A	TMEM8A	0.65698	2.11009e-31
lightsteelblue1	TAX1BP3	TAX1BP3	0.65551	3.18115e-31
lightsteelblue1	ACOT2	ACOT2	0.655192	3.47565e-31
lightsteelblue1	TP53INP2	TP53INP2	0.653765	5.16386e-31
lightsteelblue1	C4orf33	C4orf33	0.653684	5.28178e-31
lightsteelblue1	NMNAT1	NMNAT1	0.651773	8.94328e-31
lightsteelblue1	ANXA4	ANXA4	0.651488	9.66943e-31
lightsteelblue1	SELENBP1	SELENBP1	0.647956	2.53132e-30
lightsteelblue1	PTP4A1	PTP4A1	0.647729	2.69177e-30
lightsteelblue1	ARHGEF37	ARHGEF37	0.646363	3.89138e-30
lightsteelblue1	CYB5B	CYB5B	0.645374	5.07483e-30
lightsteelblue1	ENDOD1	ENDOD1	0.645222	5.28602e-30
lightsteelblue1	C10orf99	C10orf99	0.643699	7.94079e-30
lightsteelblue1	RNASE4	RNASE4	0.637587	3.9725e-29
lightsteelblue1	DAP	DAP	0.635434	6.94385e-29
lightsteelblue1	SLC25A13	SLC25A13	0.634206	9.53063e-29
lightsteelblue1	SH3YL1	SH3YL1	0.63395	1.01797e-28
lightsteelblue1	ARSD	ARSD	0.633817	1.05315e-28
lightsteelblue1	TMLHE	TMLHE	0.632805	1.3654e-28
lightsteelblue1	CTPS2	CTPS2	0.630161	2.67706e-28
lightsteelblue1	ID2	ID2	0.629231	3.38709e-28
lightsteelblue1	TRAF7	TRAF7	0.628412	4.1646e-28
lightsteelblue1	PEX19	PEX19	0.627837	4.81285e-28
lightsteelblue1	FAM55A	NA	0.627634	5.06418e-28
lightsteelblue1	CNNM2	CNNM2	0.625147	9.43176e-28
lightsteelblue1	EGLN3	EGLN3	0.624923	9.97209e-28
lightsteelblue1	TNFSF10	TNFSF10	0.623539	1.40564e-27
lightsteelblue1	ITGB5	ITGB5	0.621576	2.28074e-27
lightsteelblue1	XPNPEP1	XPNPEP1	0.620407	3.03774e-27
lightsteelblue1	PDE9A	PDE9A	0.62015	3.2349e-27
lightsteelblue1	AGFG2	AGFG2	0.618469	4.87237e-27
lightsteelblue1	FAM149A	FAM149A	0.617671	5.91284e-27
lightsteelblue1	ABHD5	ABHD5	0.617396	6.32014e-27
lightsteelblue1	HRH1	HRH1	0.617025	6.91319e-27
lightsteelblue1	C1orf43	C1orf43	0.615137	1.08962e-26
lightsteelblue1	NDUFA5	NDUFA5	0.614749	1.19597e-26
lightsteelblue1	NOSTRIN	NOSTRIN	0.614681	1.21544e-26
lightsteelblue1	RGMB	RGMB	0.614512	1.26565e-26
lightsteelblue1	EFNA2	EFNA2	0.61408	1.4037e-26
lightsteelblue1	ZFYVE28	ZFYVE28	0.612279	2.15631e-26
lightsteelblue1	CTAGE15P	NA	0.608376	5.41686e-26
lightsteelblue1	TMEM177	TMEM177	0.606793	7.84266e-26
lightsteelblue1	HIBADH	HIBADH	0.606625	8.15534e-26
lightsteelblue1	TICAM1	TICAM1	0.605015	1.18546e-25
lightsteelblue1	CYP51A1	CYP51A1	0.602891	1.93538e-25
lightsteelblue1	PON2	PON2	0.598918	4.79271e-25
lightsteelblue1	SLC35C1	SLC35C1	0.598402	5.38696e-25
lightsteelblue1	SIGMAR1	SIGMAR1	0.597145	7.15514e-25
lightsteelblue1	C11orf9	NA	0.591401	2.57701e-24
lightsteelblue1	ATG4A	ATG4A	0.590666	3.03032e-24
lightsteelblue1	CTAGE6P	NA	0.590572	3.09403e-24
lightsteelblue1	AIMP2	AIMP2	0.590502	3.142e-24
lightsteelblue1	CCNJL	CCNJL	0.587171	6.51463e-24
lightsteelblue1	DISP2	DISP2	0.585741	8.88612e-24
lightsteelblue1	SLC37A1	SLC37A1	0.584716	1.1089e-23
lightsteelblue1	SLC9A2	SLC9A2	0.583618	1.40483e-23
lightsteelblue1	KRT19	KRT19	0.583326	1.49587e-23
lightsteelblue1	ACOT13	ACOT13	0.583307	1.50202e-23
lightsteelblue1	CALM3	CALM3	0.583049	1.58752e-23
lightsteelblue1	SH2D4A	SH2D4A	0.582732	1.6992e-23
lightsteelblue1	FAM114A1	FAM114A1	0.582043	1.96929e-23
lightsteelblue1	PXN	PXN	0.579851	3.14094e-23
lightsteelblue1	SLC6A9	SLC6A9	0.57865	4.05069e-23
lightsteelblue1	EFNB1	EFNB1	0.578306	4.35575e-23
lightsteelblue1	CRYM	CRYM	0.577437	5.23158e-23
lightsteelblue1	KCNQ1	KCNQ1	0.57591	7.20766e-23
lightsteelblue1	SSBP3	SSBP3	0.57173	1.71863e-22
lightsteelblue1	LGALS9B	LGALS9B	0.571488	1.80662e-22
lightsteelblue1	C8orf55	NA	0.569568	2.68076e-22
lightsteelblue1	FAM101A	NA	0.567044	4.48695e-22
lightsteelblue1	KIAA1324	KIAA1324	0.565987	5.55963e-22
lightsteelblue1	FAM213A	NA	0.563165	9.81585e-22
lightsteelblue1	TPI1P2	TPI1P2	0.56297	1.02071e-21
lightsteelblue1	PDSS2	PDSS2	0.56079	1.57706e-21
lightsteelblue1	TRIM15	TRIM15	0.560109	1.8058e-21
lightsteelblue1	TRIL	TRIL	0.557599	2.96505e-21
lightsteelblue1	CAPN1	CAPN1	0.555001	4.93229e-21
lightsteelblue1	FGFR4	FGFR4	0.554311	5.64269e-21
lightsteelblue1	AP3S2	AP3S2	0.551921	8.96631e-21
lightsteelblue1	FUT2	FUT2	0.549296	1.48514e-20
lightsteelblue1	CAPZA2	CAPZA2	0.548829	1.62377e-20
lightsteelblue1	ARSE	ARSE	0.5471	2.25704e-20
lightsteelblue1	CEBPA	CEBPA	0.544981	3.37096e-20
lightsteelblue1	LETM1	LETM1	0.539975	8.59897e-20
lightsteelblue1	FAM134B	NA	0.539628	9.1693e-20
lightsteelblue1	ITPKC	ITPKC	0.539544	9.31363e-20
lightsteelblue1	BECN1	BECN1	0.536984	1.49348e-19
lightsteelblue1	SETD9	SETD9	0.53416	2.50262e-19
lightsteelblue1	LOC100289604	NA	0.533348	2.90045e-19
lightsteelblue1	CMTM8	CMTM8	0.53233	3.48762e-19
lightsteelblue1	MSMO1	MSMO1	0.531552	4.01386e-19
lightsteelblue1	INF2	INF2	0.528572	6.85293e-19
lightsteelblue1	CTAGE4	CTAGE4	0.528562	6.86556e-19
lightsteelblue1	MMAA	MMAA	0.527361	8.50406e-19
lightsteelblue1	PPP1R13L	PPP1R13L	0.525624	1.15737e-18
lightsteelblue1	SPACA4	SPACA4	0.52553	1.17674e-18
lightsteelblue1	SNX33	SNX33	0.52333	1.73386e-18
lightsteelblue1	FAM129B	FAM129B	0.522045	2.17143e-18
lightsteelblue1	CTAGE9	CTAGE9	0.521684	2.31291e-18
lightsteelblue1	SCAP	SCAP	0.520995	2.60831e-18
lightsteelblue1	IFT74	IFT74	0.520682	2.75441e-18
lightsteelblue1	LANCL2	LANCL2	0.519179	3.57558e-18
lightsteelblue1	YBX2	YBX2	0.518156	4.26703e-18
lightsteelblue1	LILRB5	LILRB5	0.510927	1.46403e-17
lightsteelblue1	COX15	COX15	0.508273	2.28543e-17
lightsteelblue1	MCF2L	MCF2L	0.505645	3.53866e-17
lightsteelblue1	BCMO1	NA	0.499489	9.71046e-17
lightsteelblue1	SLC9A1	SLC9A1	0.495739	1.77821e-16
lightsteelblue1	UGT2B15	UGT2B15	0.495136	1.95862e-16
lightsteelblue1	MDH1	MDH1	0.48957	4.73526e-16
lightsteelblue1	FASTKD1	FASTKD1	0.487238	6.82154e-16
lightsteelblue1	TSC22D1	TSC22D1	0.482686	1.38026e-15
lightsteelblue1	UGP2	UGP2	0.482621	1.39406e-15
lightsteelblue1	ALDH7A1	ALDH7A1	0.479938	2.10143e-15
lightsteelblue1	OAS1	OAS1	0.479098	2.38786e-15
lightsteelblue1	BDKRB2	BDKRB2	0.472233	6.69522e-15
lightsteelblue1	ITM2B	ITM2B	0.472007	6.92409e-15
lightsteelblue1	TMEM100	TMEM100	0.471777	7.16444e-15
lightsteelblue1	PIGZ	PIGZ	0.469006	1.07843e-14
lightsteelblue1	SYT13	SYT13	0.468541	1.15473e-14
lightsteelblue1	PVR	PVR	0.463558	2.38496e-14
lightsteelblue1	HDHD1	NA	0.460442	3.73104e-14
lightsteelblue1	MRRF	MRRF	0.456758	6.29673e-14
lightsteelblue1	TRIM40	TRIM40	0.450131	1.58926e-13
lightsteelblue1	KIAA0664	NA	0.4496	1.7102e-13
lightsteelblue1	SCUBE2	SCUBE2	0.448933	1.87478e-13
lightsteelblue1	HIST1H2BG	HIST1H2BG	0.447855	2.17409e-13
lightsteelblue1	ZFYVE21	ZFYVE21	0.444887	3.25995e-13
lightsteelblue1	COX20	COX20	0.442912	4.25913e-13
lightsteelblue1	CDK7	CDK7	0.441157	5.39432e-13
lightsteelblue1	NIPSNAP1	NIPSNAP1	0.439129	7.07497e-13
lightsteelblue1	FOXL1	FOXL1	0.437176	9.1711e-13
lightsteelblue1	ALDH1B1	ALDH1B1	0.436785	9.65782e-13
lightsteelblue1	PLCD1	PLCD1	0.429076	2.64381e-12
lightsteelblue1	HPSE2	HPSE2	0.423749	5.22392e-12
lightsteelblue1	C9orf85	C9orf85	0.409921	2.89724e-11
lightsteelblue1	ARRB1	ARRB1	0.409506	3.04661e-11
lightsteelblue1	STEAP3	STEAP3	0.403518	6.23909e-11
lightsteelblue1	NAGA	NAGA	0.401499	7.91906e-11
lightsteelblue1	LOC387647	NA	0.395428	1.60697e-10
lightsteelblue1	ZNF629	ZNF629	0.392901	2.14807e-10
lightsteelblue1	FA2H	FA2H	0.392673	2.20496e-10
lightsteelblue1	MIR22HG	MIR22HG	0.392352	2.28714e-10
lightsteelblue1	MFSD4	NA	0.391227	2.60029e-10
lightsteelblue1	CHGB	CHGB	0.383428	6.24153e-10
lightsteelblue1	VSIG4	VSIG4	0.377246	1.22948e-09
lightsteelblue1	PODN	PODN	0.368664	3.07832e-09
lightsteelblue1	HMGCS2	HMGCS2	0.359526	7.94449e-09
lightsteelblue1	ZNF410	ZNF410	0.358228	9.06768e-09
lightsteelblue1	ID4	ID4	0.348459	2.40797e-08
lightsteelblue1	CLSTN1	CLSTN1	0.3473	2.698e-08
lightsteelblue1	KCNS3	KCNS3	0.346964	2.78816e-08
lightsteelblue1	LOC401321	NA	0.337454	6.95727e-08
lightsteelblue1	ASCC2	ASCC2	0.33604	7.95003e-08
lightsteelblue1	CRNKL1	CRNKL1	0.319625	3.56307e-07
lightsteelblue1	NDRG2	NDRG2	0.313413	6.14368e-07
lightsteelblue1	RASD1	RASD1	0.312632	6.57356e-07
lightsteelblue1	UGT2B17	UGT2B17	0.3101	8.17439e-07
lightsteelblue1	HIST2H2BE	HIST2H2BE	0.305809	1.17726e-06
lightsteelblue1	ACTR3C	ACTR3C	0.280895	8.74917e-06
lightsteelblue1	HSD17B6	HSD17B6	0.275109	1.35732e-05
lightsteelblue1	GAS6	GAS6	0.264974	2.86075e-05
lightsteelblue1	ALG12	ALG12	0.253607	6.37402e-05
lightsteelblue1	LOC400643	NA	0.216956	0.0006611
lightsteelblue1	ID3	ID3	0.215129	0.000735881
lightsteelblue1	DCTN5	DCTN5	0.188731	0.00314248
lightsteelblue1	CLIP2	CLIP2	0.158621	0.0133014
lightsteelblue1	OR2A9P	OR2A9P	0.136948	0.0328533
brown4	COX5A	COX5A	0.948872	1.11129e-122
brown4	RAB25	RAB25	0.931792	4.74685e-108
brown4	ATP5G3	NA	0.924342	7.98128e-103
brown4	NDUFA9	NDUFA9	0.901262	1.64126e-89
brown4	UQCRFS1	UQCRFS1	0.895745	8.14579e-87
brown4	MYL12B	MYL12B	0.893973	5.55961e-86
brown4	ATP5C1	NA	0.892238	3.5245e-85
brown4	AP1M2	AP1M2	0.884988	5.71761e-82
brown4	NDUFS2	NDUFS2	0.877146	9.88547e-79
brown4	PDZD11	PDZD11	0.875968	2.89763e-78
brown4	COX6A1	COX6A1	0.875373	4.96802e-78
brown4	VPS25	VPS25	0.874998	6.96534e-78
brown4	FAM162A	FAM162A	0.871253	1.92787e-76
brown4	C15orf48	C15orf48	0.870905	2.61143e-76
brown4	ATP5H	NA	0.868396	2.26502e-75
brown4	TMEM54	TMEM54	0.863781	1.07587e-73
brown4	KRTCAP3	KRTCAP3	0.862179	3.97569e-73
brown4	ALG14	ALG14	0.861839	5.23324e-73
brown4	NDUFS4	NDUFS4	0.861075	9.69303e-73
brown4	ATP5A1	NA	0.86032	1.7756e-72
brown4	NDUFA8	NDUFA8	0.859026	4.96551e-72
brown4	KDELR2	KDELR2	0.858251	9.15081e-72
brown4	ETHE1	ETHE1	0.857215	2.06052e-71
brown4	LGALS4	LGALS4	0.856648	3.20273e-71
brown4	HEBP2	HEBP2	0.85207	1.0565e-69
brown4	CYSTM1	CYSTM1	0.850994	2.3623e-69
brown4	NDUFB3	NDUFB3	0.850549	3.28771e-69
brown4	CKMT1A	CKMT1A	0.850151	4.41655e-69
brown4	COPZ1	COPZ1	0.849651	6.38797e-69
brown4	ATP5F1	NA	0.847771	2.53316e-68
brown4	ATP5B	NA	0.846267	7.52218e-68
brown4	ASL	ASL	0.845182	1.63747e-67
brown4	SOD1	SOD1	0.842437	1.14104e-66
brown4	PPCS	PPCS	0.840452	4.53857e-66
brown4	MGST2	MGST2	0.840294	5.06308e-66
brown4	FOXA3	FOXA3	0.838365	1.90032e-65
brown4	FAM3D	FAM3D	0.837831	2.7315e-65
brown4	MDH2	MDH2	0.836612	6.22562e-65
brown4	ZDHHC12	ZDHHC12	0.836604	6.25948e-65
brown4	PPA2	PPA2	0.835762	1.10147e-64
brown4	IMPA2	IMPA2	0.835369	1.43292e-64
brown4	CKMT1B	CKMT1B	0.832691	8.42579e-64
brown4	BRP44L	NA	0.832444	9.90201e-64
brown4	SPR	SPR	0.830967	2.59153e-63
brown4	TMX2	TMX2	0.830887	2.72973e-63
brown4	DCTN2	DCTN2	0.829827	5.41247e-63
brown4	SLC25A10	SLC25A10	0.828226	1.50872e-62
brown4	KDELR1	KDELR1	0.821116	1.26123e-60
brown4	NDUFB5	NDUFB5	0.820866	1.46847e-60
brown4	MRPL13	MRPL13	0.818907	4.79249e-60
brown4	NDUFB6	NDUFB6	0.81552	3.58625e-59
brown4	PPP1R1B	PPP1R1B	0.814024	8.61002e-59
brown4	YWHAE	YWHAE	0.813129	1.44802e-58
brown4	RNF7	RNF7	0.812539	2.03794e-58
brown4	DBI	DBI	0.810639	6.06798e-58
brown4	SLC25A3	SLC25A3	0.806713	5.56475e-57
brown4	DYNLT1	DYNLT1	0.806352	6.80424e-57
brown4	PDHA1	PDHA1	0.805931	8.59696e-57
brown4	DHRS7B	DHRS7B	0.805114	1.35232e-56
brown4	C9orf46	NA	0.804274	2.14912e-56
brown4	RPS27L	RPS27L	0.803957	2.5585e-56
brown4	S100A10	S100A10	0.800233	1.93437e-55
brown4	LSR	LSR	0.798818	4.12487e-55
brown4	PPIC	PPIC	0.798145	5.90112e-55
brown4	POLDIP2	POLDIP2	0.798018	6.31565e-55
brown4	ARF1	ARF1	0.796006	1.826e-54
brown4	IER3IP1	IER3IP1	0.794607	3.79389e-54
brown4	STX19	STX19	0.7934	7.10009e-54
brown4	AVPI1	AVPI1	0.793201	7.86745e-54
brown4	TSPAN15	TSPAN15	0.788241	9.86336e-53
brown4	ALDH2	ALDH2	0.785624	3.64378e-52
brown4	DBNDD2	DBNDD2	0.785111	4.69895e-52
brown4	GALM	GALM	0.783681	9.50376e-52
brown4	MRPL15	MRPL15	0.781539	2.7029e-51
brown4	SPDEF	SPDEF	0.78151	2.74142e-51
brown4	RTN3	RTN3	0.781448	2.82413e-51
brown4	PSMD8	PSMD8	0.777943	1.52182e-50
brown4	MGST1	MGST1	0.775898	4.00915e-50
brown4	ATP6V1D	ATP6V1D	0.775727	4.34514e-50
brown4	RAC1	RAC1	0.773139	1.45729e-49
brown4	ANXA11	ANXA11	0.770111	5.88438e-49
brown4	SNX7	SNX7	0.767389	2.02607e-48
brown4	PKP3	PKP3	0.766322	3.27499e-48
brown4	SAP18	SAP18	0.765372	5.01167e-48
brown4	JAGN1	JAGN1	0.760587	4.14109e-47
brown4	ASS1	ASS1	0.759697	6.09873e-47
brown4	KRT18	KRT18	0.758534	1.00918e-46
brown4	QDPR	QDPR	0.756473	2.4463e-46
brown4	C18orf32	C18orf32	0.75538	3.89891e-46
brown4	GLRX2	GLRX2	0.754024	6.92793e-46
brown4	CHCHD8	NA	0.753952	7.14235e-46
brown4	FAM108C1	NA	0.749883	3.91661e-45
brown4	TMEM61	TMEM61	0.742242	8.77187e-44
brown4	FH	FH	0.740599	1.68741e-43
brown4	VDAC3	VDAC3	0.739799	2.31572e-43
brown4	ERP44	ERP44	0.737343	6.07992e-43
brown4	RAB1B	RAB1B	0.736259	9.27638e-43
brown4	ELF3	ELF3	0.73481	1.62692e-42
brown4	TCEA3	TCEA3	0.73109	6.76168e-42
brown4	PIGF	PIGF	0.726709	3.51375e-41
brown4	AP1S1	AP1S1	0.726084	4.43382e-41
brown4	SF3B14	NA	0.725634	5.23926e-41
brown4	MRPS35	MRPS35	0.724102	9.2294e-41
brown4	LGALS3BP	LGALS3BP	0.722337	1.76293e-40
brown4	FUCA2	FUCA2	0.721403	2.47806e-40
brown4	BSPRY	BSPRY	0.719258	5.39014e-40
brown4	PLEK2	PLEK2	0.716487	1.45486e-39
brown4	NDUFB4	NDUFB4	0.71568	1.93836e-39
brown4	PLA2G10	PLA2G10	0.711046	9.88077e-39
brown4	ELOVL1	ELOVL1	0.706512	4.71338e-38
brown4	VDAC2	VDAC2	0.704655	8.86318e-38
brown4	FCGBP	FCGBP	0.699522	4.94964e-37
brown4	SCGB2A1	SCGB2A1	0.698534	6.8648e-37
brown4	SDC1	SDC1	0.698408	7.15584e-37
brown4	TMEM51	TMEM51	0.694856	2.29068e-36
brown4	LGALS9C	LGALS9C	0.693983	3.04159e-36
brown4	DNAJC15	DNAJC15	0.693965	3.05951e-36
brown4	SLC39A11	SLC39A11	0.684141	6.93155e-35
brown4	MRPS22	MRPS22	0.68315	9.43251e-35
brown4	PEX7	PEX7	0.682696	1.08569e-34
brown4	WNT4	WNT4	0.678853	3.53613e-34
brown4	COQ5	COQ5	0.674107	1.48257e-33
brown4	ICA1	ICA1	0.670331	4.55083e-33
brown4	NDUFA12	NDUFA12	0.670234	4.68352e-33
brown4	CYC1	CYC1	0.669109	6.52006e-33
brown4	MAD2L1BP	MAD2L1BP	0.664373	2.58378e-32
brown4	ITLN1	ITLN1	0.65962	1.00375e-31
brown4	TMEM62	TMEM62	0.65475	3.93028e-31
brown4	CHCHD4	CHCHD4	0.650985	1.1099e-30
brown4	CORO1B	CORO1B	0.648185	2.37905e-30
brown4	HES1	HES1	0.644959	5.672e-30
brown4	HEXB	HEXB	0.641048	1.60349e-29
brown4	ACP1	ACP1	0.638516	3.11737e-29
brown4	FRAT2	FRAT2	0.631775	1.776e-28
brown4	NUDT15	NUDT15	0.631759	1.78353e-28
brown4	RASL11A	RASL11A	0.630628	2.37805e-28
brown4	RNASE1	RNASE1	0.630509	2.45119e-28
brown4	LTBR	LTBR	0.629249	3.37216e-28
brown4	CMC1	CMC1	0.628552	4.02011e-28
brown4	H2AFY	H2AFY	0.625534	8.56534e-28
brown4	TP53I3	TP53I3	0.623793	1.3201e-27
brown4	CTSA	CTSA	0.618855	4.43615e-27
brown4	TRUB2	TRUB2	0.61675	7.38817e-27
brown4	PPP1R11	PPP1R11	0.616028	8.79456e-27
brown4	STX18	STX18	0.61571	9.49341e-27
brown4	ARFIP2	ARFIP2	0.601869	2.44693e-25
brown4	OCIAD1	OCIAD1	0.599113	4.58552e-25
brown4	SCO1	SCO1	0.598311	5.49989e-25
brown4	ACTR10	ACTR10	0.598244	5.58358e-25
brown4	CREB3L4	CREB3L4	0.594484	1.29951e-24
brown4	TMEM85	NA	0.591889	2.31321e-24
brown4	TPSG1	TPSG1	0.589598	3.83275e-24
brown4	CTTN	CTTN	0.586083	8.24982e-24
brown4	GLB1L2	GLB1L2	0.578525	4.15916e-23
brown4	MLPH	MLPH	0.5745	9.67616e-23
brown4	PSMA6	PSMA6	0.572894	1.35108e-22
brown4	OPLAH	OPLAH	0.570427	2.24769e-22
brown4	APITD1	NA	0.565919	5.63681e-22
brown4	RPH3AL	RPH3AL	0.562322	1.1621e-21
brown4	CTDSPL	CTDSPL	0.561718	1.31108e-21
brown4	HIBCH	HIBCH	0.555663	4.3347e-21
brown4	TXNDC12	TXNDC12	0.554043	5.94411e-21
brown4	ZBTB42	ZBTB42	0.553748	6.29445e-21
brown4	GSDMB	GSDMB	0.552758	7.62784e-21
brown4	GFRA3	GFRA3	0.549393	1.45786e-20
brown4	LXN	LXN	0.544465	3.71534e-20
brown4	GMNN	GMNN	0.540739	7.4612e-20
brown4	MYCBP	MYCBP	0.540122	8.36774e-20
brown4	TCEAL8	TCEAL8	0.536766	1.55433e-19
brown4	MTX2	MTX2	0.535659	1.90401e-19
brown4	HMGN5	HMGN5	0.534697	2.26957e-19
brown4	EFNA3	EFNA3	0.525503	1.18245e-18
brown4	IMMT	IMMT	0.519319	3.48965e-18
brown4	LPCAT4	LPCAT4	0.513105	1.01296e-17
brown4	CCDC51	CCDC51	0.490054	4.38761e-16
brown4	INPP1	INPP1	0.487625	6.42182e-16
brown4	FAM174A	FAM174A	0.483171	1.28104e-15
brown4	SRP9	SRP9	0.470867	8.19709e-15
brown4	XRCC6BP1	NA	0.46903	1.07465e-14
brown4	MCEE	MCEE	0.455912	7.09522e-14
brown4	FADD	FADD	0.455639	7.37246e-14
brown4	CAMKMT	CAMKMT	0.451801	1.26087e-13
brown4	NHLRC1	NHLRC1	0.447665	2.23135e-13
brown4	C1orf53	C1orf53	0.446437	2.63964e-13
brown4	REG4	REG4	0.434197	1.35818e-12
brown4	ESD	ESD	0.431587	1.90984e-12
brown4	NUDT6	NUDT6	0.406816	4.21109e-11
brown4	BDKRB1	BDKRB1	0.405165	5.1298e-11
brown4	BZW2	BZW2	0.386025	4.67484e-10
brown4	ECHDC1	ECHDC1	0.380008	9.09755e-10
brown4	DNAJB1	DNAJB1	0.379873	9.23304e-10
brown4	MRPL39	MRPL39	0.377356	1.21488e-09
brown4	PPP2CA	PPP2CA	0.372425	2.06565e-09
brown4	TATDN1	TATDN1	0.352056	1.68713e-08
brown4	LIPT2	LIPT2	0.30741	1.02815e-06
brown4	HSPA1B	HSPA1B	0.276274	1.24345e-05
brown4	TCP1	TCP1	0.257625	4.82211e-05
brown4	GGTA1P	GGTA1P	0.252584	6.83814e-05
brown4	DDX19B	DDX19B	0.186267	0.00356615
brown4	BET1	BET1	0.164737	0.010101
brown4	HYLS1	HYLS1	0.148644	0.0204452
brown4	HSPA1A	HSPA1A	0.122255	0.0570294
darkolivegreen	DLGAP5	DLGAP5	0.939766	2.41063e-114
darkolivegreen	BUB1	BUB1	0.920919	1.33728e-100
darkolivegreen	NCAPH	NCAPH	0.918719	3.18849e-99
darkolivegreen	RACGAP1	RACGAP1	0.916197	1.08331e-97
darkolivegreen	BUB1B	BUB1B	0.914485	1.11445e-96
darkolivegreen	KIF23	KIF23	0.912188	2.35933e-95
darkolivegreen	KIF11	KIF11	0.906783	2.25539e-92
darkolivegreen	HMMR	HMMR	0.90543	1.17724e-91
darkolivegreen	PRC1	PRC1	0.904316	4.50079e-91
darkolivegreen	RFC3	RFC3	0.90142	1.36721e-89
darkolivegreen	PLK4	PLK4	0.900764	2.91775e-89
darkolivegreen	SGOL2	NA	0.9007	3.13949e-89
darkolivegreen	LMNB1	LMNB1	0.8974	1.3137e-87
darkolivegreen	NUSAP1	NUSAP1	0.891196	1.05283e-84
darkolivegreen	FAM111B	FAM111B	0.889173	8.54147e-84
darkolivegreen	NCAPG2	NCAPG2	0.885126	4.99253e-82
darkolivegreen	ARHGAP11A	ARHGAP11A	0.884713	7.49171e-82
darkolivegreen	CDK1	CDK1	0.88358	2.26809e-81
darkolivegreen	CEP55	CEP55	0.880408	4.74089e-80
darkolivegreen	NCAPG	NCAPG	0.880038	6.71679e-80
darkolivegreen	MCM4	MCM4	0.879299	1.34428e-79
darkolivegreen	ZWILCH	ZWILCH	0.879152	1.54173e-79
darkolivegreen	CENPF	CENPF	0.876032	2.73345e-78
darkolivegreen	MELK	MELK	0.873897	1.86904e-77
darkolivegreen	TOP2A	TOP2A	0.873543	2.5628e-77
darkolivegreen	KIF4A	KIF4A	0.873403	2.90184e-77
darkolivegreen	CDCA8	CDCA8	0.871426	1.65769e-76
darkolivegreen	ASPM	ASPM	0.867116	6.70391e-75
darkolivegreen	GTSE1	GTSE1	0.866674	9.72815e-75
darkolivegreen	ZWINT	ZWINT	0.865804	2.01551e-74
darkolivegreen	ANLN	ANLN	0.865552	2.48761e-74
darkolivegreen	GINS4	GINS4	0.864654	5.23897e-74
darkolivegreen	WDHD1	WDHD1	0.86353	1.32112e-73
darkolivegreen	KIAA1524	NA	0.863353	1.52767e-73
darkolivegreen	CDCA2	CDCA2	0.862845	2.31353e-73
darkolivegreen	DBF4	DBF4	0.860127	2.07071e-72
darkolivegreen	TMEM48	NA	0.858405	8.10618e-72
darkolivegreen	RAD51AP1	RAD51AP1	0.855124	1.0391e-70
darkolivegreen	TTK	TTK	0.854416	1.78815e-70
darkolivegreen	NDC80	NDC80	0.853847	2.75919e-70
darkolivegreen	KIF15	KIF15	0.85212	1.01714e-69
darkolivegreen	RRM2	RRM2	0.851055	2.25753e-69
darkolivegreen	CCNA2	CCNA2	0.849852	5.50857e-69
darkolivegreen	KIF20A	KIF20A	0.847558	2.95592e-68
darkolivegreen	EXO1	EXO1	0.84709	4.15259e-68
darkolivegreen	HJURP	HJURP	0.845657	1.16535e-67
darkolivegreen	CDC6	CDC6	0.845217	1.59703e-67
darkolivegreen	BRCA1	BRCA1	0.842211	1.33677e-66
darkolivegreen	CENPE	CENPE	0.840667	3.91374e-66
darkolivegreen	MCM6	MCM6	0.8393	1.0034e-65
darkolivegreen	ATAD2	ATAD2	0.838591	1.62937e-65
darkolivegreen	MKI67	MKI67	0.838423	1.82721e-65
darkolivegreen	TYMS	TYMS	0.838238	2.07192e-65
darkolivegreen	ORC1	ORC1	0.837991	2.45033e-65
darkolivegreen	PAICS	PAICS	0.837745	2.89577e-65
darkolivegreen	NUF2	NUF2	0.837117	4.4293e-65
darkolivegreen	CENPA	CENPA	0.836872	5.22744e-65
darkolivegreen	CCDC99	NA	0.835077	1.74066e-64
darkolivegreen	DEPDC1	DEPDC1	0.834193	3.13048e-64
darkolivegreen	TIMELESS	TIMELESS	0.83251	9.48828e-64
darkolivegreen	HELLS	HELLS	0.831052	2.45359e-63
darkolivegreen	CKAP2L	CKAP2L	0.825702	7.4283e-62
darkolivegreen	TPX2	TPX2	0.823188	3.54481e-61
darkolivegreen	PBK	PBK	0.819695	2.98284e-60
darkolivegreen	TCF19	TCF19	0.819579	3.19886e-60
darkolivegreen	DTL	DTL	0.818003	8.23622e-60
darkolivegreen	CEP78	CEP78	0.814035	8.5549e-59
darkolivegreen	E2F8	E2F8	0.811311	4.13032e-58
darkolivegreen	PARPBP	PARPBP	0.811266	4.23905e-58
darkolivegreen	SMC2	SMC2	0.809488	1.16767e-57
darkolivegreen	CCNB1	CCNB1	0.809054	1.49348e-57
darkolivegreen	RCC1	RCC1	0.808505	2.03668e-57
darkolivegreen	AURKA	AURKA	0.808372	2.19447e-57
darkolivegreen	OXCT1	OXCT1	0.805231	1.26777e-56
darkolivegreen	KPNA2	KPNA2	0.80475	1.65338e-56
darkolivegreen	MAD2L1	MAD2L1	0.801435	1.01161e-55
darkolivegreen	LMNB2	LMNB2	0.801068	1.23317e-55
darkolivegreen	KIF2C	KIF2C	0.799642	2.65654e-55
darkolivegreen	FBXO5	FBXO5	0.798292	5.45863e-55
darkolivegreen	KIF18B	KIF18B	0.79574	2.09971e-54
darkolivegreen	CENPK	CENPK	0.792928	9.06208e-54
darkolivegreen	SHCBP1	SHCBP1	0.791551	1.83918e-53
darkolivegreen	FANCI	FANCI	0.787717	1.28309e-52
darkolivegreen	FAM83D	FAM83D	0.786164	2.78663e-52
darkolivegreen	MCM3	MCM3	0.785008	4.94439e-52
darkolivegreen	MLH1	MLH1	0.781611	2.6105e-51
darkolivegreen	SMC4	SMC4	0.781568	2.66485e-51
darkolivegreen	STIL	STIL	0.777699	1.70943e-50
darkolivegreen	MCM2	MCM2	0.774627	7.28203e-50
darkolivegreen	KIF20B	KIF20B	0.771215	3.54576e-49
darkolivegreen	PLK1	PLK1	0.770757	4.37625e-49
darkolivegreen	C15orf23	NA	0.769246	8.73157e-49
darkolivegreen	SRSF1	SRSF1	0.767781	1.69751e-48
darkolivegreen	SUV39H2	SUV39H2	0.765248	5.29684e-48
darkolivegreen	GINS3	GINS3	0.763868	9.78279e-48
darkolivegreen	DSCC1	DSCC1	0.758973	8.34989e-47
darkolivegreen	GINS1	GINS1	0.758844	8.82821e-47
darkolivegreen	LBR	LBR	0.758038	1.25003e-46
darkolivegreen	TRIP13	TRIP13	0.754481	5.71017e-46
darkolivegreen	ECT2	ECT2	0.752476	1.3291e-45
darkolivegreen	CENPN	CENPN	0.74969	4.24341e-45
darkolivegreen	ADK	ADK	0.743296	5.75198e-44
darkolivegreen	FANCA	FANCA	0.740998	1.44035e-43
darkolivegreen	CHAF1B	CHAF1B	0.733125	3.11111e-42
darkolivegreen	NEK2	NEK2	0.732335	4.20957e-42
darkolivegreen	DEPDC1B	DEPDC1B	0.731275	6.3032e-42
darkolivegreen	NCAPD3	NCAPD3	0.730472	8.54991e-42
darkolivegreen	SKA3	SKA3	0.725846	4.84309e-41
darkolivegreen	KIFC1	KIFC1	0.709231	1.85339e-38
darkolivegreen	HAT1	HAT1	0.706337	5.00423e-38
darkolivegreen	RRM1	RRM1	0.703164	1.46636e-37
darkolivegreen	VRK1	VRK1	0.70048	3.60117e-37
darkolivegreen	DNAJC9	DNAJC9	0.694895	2.26212e-36
darkolivegreen	OIP5	OIP5	0.689641	1.22701e-35
darkolivegreen	CDC25A	CDC25A	0.685441	4.61981e-35
darkolivegreen	HMGB2	HMGB2	0.680297	2.27334e-34
darkolivegreen	ODC1	ODC1	0.676709	6.77826e-34
darkolivegreen	POLE2	POLE2	0.671172	3.55024e-33
darkolivegreen	GNL2	GNL2	0.664646	2.3883e-32
darkolivegreen	PAK1IP1	PAK1IP1	0.661634	5.66463e-32
darkolivegreen	SSB	SSB	0.659754	9.66454e-32
darkolivegreen	SPC24	SPC24	0.639328	2.52035e-29
darkolivegreen	SCFD2	SCFD2	0.613027	1.80476e-26
darkolivegreen	SAPCD2	SAPCD2	0.611848	2.38851e-26
darkolivegreen	NUP35	NUP35	0.605612	1.03213e-25
darkolivegreen	NIF3L1	NIF3L1	0.599723	3.99235e-25
darkolivegreen	CDCA7	CDCA7	0.582087	1.95047e-23
darkolivegreen	YARS2	YARS2	0.573178	1.27368e-22
darkolivegreen	CENPO	CENPO	0.567955	3.72742e-22
darkolivegreen	BCCIP	BCCIP	0.540952	7.17175e-20
darkolivegreen	PET112	NA	0.499507	9.68266e-17
darkolivegreen	TIMM21	TIMM21	0.492127	3.16294e-16
darkolivegreen	ORC5	ORC5	0.436904	9.50765e-13
greenyellow	BPHL	BPHL	0.964772	9.32427e-142
greenyellow	SLC9A3R1	SLC9A3R1	0.961666	2.04427e-137
greenyellow	C1orf115	C1orf115	0.954086	3.5827e-128
greenyellow	MS4A8B	NA	0.952063	5.71115e-126
greenyellow	SLC39A5	SLC39A5	0.950267	4.31065e-124
greenyellow	CYB5A	CYB5A	0.949616	1.98512e-123
greenyellow	DHRS11	DHRS11	0.949452	2.91057e-123
greenyellow	TUBAL3	TUBAL3	0.949279	4.34298e-123
greenyellow	AQP7	AQP7	0.94845	2.91535e-122
greenyellow	CES2	CES2	0.947491	2.53386e-121
greenyellow	RAB17	RAB17	0.946635	1.68898e-120
greenyellow	CYP2J2	CYP2J2	0.945723	1.22968e-119
greenyellow	CDHR5	CDHR5	0.945456	2.18527e-119
greenyellow	PCK2	PCK2	0.943745	8.14254e-118
greenyellow	SOWAHA	SOWAHA	0.94335	1.84635e-117
greenyellow	MYO1A	MYO1A	0.94257	9.16058e-117
greenyellow	LOC100507500	NA	0.941385	9.98464e-116
greenyellow	ASB13	ASB13	0.941251	1.30418e-115
greenyellow	SLC5A11	SLC5A11	0.939899	1.8602e-114
greenyellow	ACY1	ACY1	0.93953	3.80513e-114
greenyellow	PEPD	PEPD	0.939042	9.72226e-114
greenyellow	HEBP1	HEBP1	0.938903	1.27029e-113
greenyellow	NAALADL1	NAALADL1	0.938061	6.26959e-113
greenyellow	HSD17B11	HSD17B11	0.936416	1.33458e-111
greenyellow	PGRMC2	PGRMC2	0.93553	6.69966e-111
greenyellow	SFRP5	SFRP5	0.934856	2.25037e-110
greenyellow	DDC	DDC	0.934536	3.98397e-110
greenyellow	SEPHS2	SEPHS2	0.933753	1.59039e-109
greenyellow	AKR7L	AKR7L	0.933574	2.1803e-109
greenyellow	43892	NA	0.933185	4.29962e-109
greenyellow	REEP6	REEP6	0.932964	6.31486e-109
greenyellow	DGAT1	DGAT1	0.932141	2.61179e-108
greenyellow	SLC28A1	SLC28A1	0.931815	4.56296e-108
greenyellow	SLC23A1	SLC23A1	0.931788	4.77993e-108
greenyellow	GDPD2	GDPD2	0.931463	8.30773e-108
greenyellow	EDN3	EDN3	0.931134	1.44897e-107
greenyellow	CHP2	CHP2	0.930736	2.83073e-107
greenyellow	GAL3ST1	GAL3ST1	0.930318	5.69619e-107
greenyellow	MAOB	MAOB	0.929946	1.05827e-106
greenyellow	PGRMC1	PGRMC1	0.929558	2.01217e-106
greenyellow	NAT8B	NAT8B	0.929531	2.1013e-106
greenyellow	PDZK1P2	NA	0.92873	7.80647e-106
greenyellow	PDZK1P1	PDZK1P1	0.928284	1.61199e-105
greenyellow	FAM109A	NA	0.927966	2.69507e-105
greenyellow	LOC100507203	NA	0.927524	5.47518e-105
greenyellow	USP37	USP37	0.927435	6.31907e-105
greenyellow	SLC37A4	SLC37A4	0.927172	9.62132e-105
greenyellow	SLC23A3	SLC23A3	0.927098	1.08162e-104
greenyellow	PTGR1	PTGR1	0.926124	5.04376e-104
greenyellow	FADS6	FADS6	0.926052	5.64226e-104
greenyellow	SLC13A2	SLC13A2	0.925926	6.87898e-104
greenyellow	CBR1	CBR1	0.925862	7.59633e-104
greenyellow	TMEM41A	TMEM41A	0.925697	9.8435e-104
greenyellow	EPHX2	EPHX2	0.925672	1.02317e-103
greenyellow	IGSF23	IGSF23	0.924465	6.6183e-103
greenyellow	SLC39A4	SLC39A4	0.923189	4.60023e-102
greenyellow	KHK	KHK	0.922906	7.05001e-102
greenyellow	INPP5J	INPP5J	0.922578	1.15169e-101
greenyellow	DHRS7	DHRS7	0.922126	2.2575e-101
greenyellow	CYP2C18	CYP2C18	0.922125	2.26236e-101
greenyellow	MS4A10	MS4A10	0.921456	6.08887e-101
greenyellow	HNF1A	HNF1A	0.921194	8.94327e-101
greenyellow	CHN2	CHN2	0.920927	1.32295e-100
greenyellow	SLC5A12	SLC5A12	0.920648	1.98609e-100
greenyellow	USH1C	USH1C	0.920479	2.54141e-100
greenyellow	ACE	ACE	0.920285	3.36952e-100
greenyellow	EDN2	EDN2	0.920105	4.36874e-100
greenyellow	MGAT4B	MGAT4B	0.919473	1.08665e-99
greenyellow	STRADB	STRADB	0.918724	3.16597e-99
greenyellow	NAGS	NAGS	0.91747	1.85417e-98
greenyellow	DNASE1	DNASE1	0.917365	2.14687e-98
greenyellow	KCNK5	KCNK5	0.917139	2.9413e-98
greenyellow	SULT1A2	SULT1A2	0.916349	8.79266e-98
greenyellow	PKLR	PKLR	0.915843	1.76115e-97
greenyellow	ZNF488	ZNF488	0.915714	2.10244e-97
greenyellow	CPO	CPO	0.915631	2.35423e-97
greenyellow	FLJ22763	NA	0.91507	5.05391e-97
greenyellow	ACE2	ACE2	0.913663	3.35668e-96
greenyellow	TM6SF2	TM6SF2	0.913633	3.49487e-96
greenyellow	BDH2	BDH2	0.913208	6.14701e-96
greenyellow	LRRC28	LRRC28	0.912649	1.28671e-95
greenyellow	ABCG2	ABCG2	0.91247	1.62929e-95
greenyellow	CDHR2	CDHR2	0.912403	1.77935e-95
greenyellow	SLC6A4	SLC6A4	0.912253	2.16591e-95
greenyellow	CDKN2B-AS1	CDKN2B-AS1	0.912208	2.29701e-95
greenyellow	NAT8	NAT8	0.911991	3.05338e-95
[truncated: 11,851 more rows]
